# Supplementary material for: Technical Note: Past and future warming – direct comparison on multi-century timescales
Source: Copernicus journal article supplement (doi:10.5194/cp-18-911-2022), 2022-04-26
Supplement: Supplementary file 1 [file cp-18-911-2022-supplement.zip]

Archive with 2 entries (2 files):
- TemperatureData.xlsx
- cp-18-911-2022-supplement-title-page.pdf
