# Supplementary material for: Technical Note: Past and future warming – direct comparison on multi-century timescales
Source: Copernicus journal article supplement (doi:10.5194/cp-18-911-2022), 2022-04-26
Supplement: Supplementary file 1 [file cp-18-911-2022-supplement.zip › cp-18-911-2022-supplement-title-page.pdf]

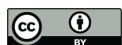

## *Supplement of*

# **Technical Note: Past and future warming – direct comparison on multi-century timescales**

**Darrell S. Kaufman and Nicholas P. McKay**

*Correspondence to:* Darrell S. Kaufman ([darrell.kaufman@nau.edu](mailto:darrell.kaufman@nau.edu))

- [cp-18-911-2022-supplement-title-page.pdf](#)
- [TemperatureData.xlsx](#)

The copyright of individual parts of the supplement might differ from the article licence.
