# Supplementary material for: Technical Note: Past and future warming – direct comparison on multi-century timescales
Source: Copernicus journal article supplement (doi:10.5194/cp-18-911-2022), 2022-04-26
Supplement: Supplementary file 1 [file cp-18-911-2022-supplement.zip › TemperatureData.xlsx]

## Sheet: readMe
The time series data in figure 1 are in this file, and are also available available at the Github repository https://github.com/nickmckay/past-and-future-warming-comparison-figure/ and the version used for this paper is archived on Zenodo (McKay and Kaufman, 2022).
The data are available from publicaly accessible sources, and have been modified to align to the 1850-1900 baseline as follows:
Data set: Late Quaternary global temperature according to equations by Hansen et al. (2013) applied to benthic marine oxygen isotope stack of Zachos et al. (2008).
Available: http://www.columbia.edu/~mhs119/Sensitivity+SL+CO2/Table.txt (last access: 21 March 2022).
Modified: Subtracted 14.15° C to adjust temperature relative to 1961-1990 and added 0.36°C to adjust to 1850-1900 reference period, based on the AR6 assessed four data set mean (Trewin, 2022; GMST-component_data_sets.csv).
Data set: Late Quaternary multi-proxy sea surface temperature stack converted to global temperature by Snyder (2016).
Available: https://static-content.springer.com/esm/art%3A10.1038%2Fnature19798/MediaObjects/41586_2016_BFnature19798_MOESM258_ESM.xlsx (last access: 21 March 2022).
Modified: Added 0.23° C to adjust late Holocene temperature to the 1850-1900 reference period, based on the reconstruction of Kaufman et al. (2020b).
Data set: Holocene multi-method ensemble global temperature of Kaufman et al. (2020b), based on multi-proxy marine and terrestrial paleotemperature data (Temp12k; Kaufman et al., 2020a), using code of Routson et al. (2020), https://doi.org/10.5281/zenodo.3888590.
Available: https://www.ncei.noaa.gov/access/paleo-search/study/29712 (Kaufman et al., 2020c; temp12k_allmethods_percentiles).
Modified: Subtracted 0.03° C to adjust 19th century mean temperature to 1850-1900 reference period based on PAGES 2k Consortium (2019) 10-year smoothed multi-method reconstruction (Gillett et al., 2021; SPM1_1-2000.csv).
Data set: Last Glacial Maximum reanalysis (LGMR) of Osman et al. (2021a) based on marine paleotemperature data (Osman et al., 2021b; proxyDatabase.nc) assimilated using climate model (iCESM) priors and code from https://github.com/JonKing93/DASH, v.3.6.1.
Available: https://www.ncei.noaa.gov/access/paleo-search/study/33112 (Osman et al., 2021b; LGMR_GMST_ens.nc).
Modified: Subtracted 13.49°C (median of the most recent bin) to adjust temperature relative to 1750-1950 and added 0.03° C to adjust to 1850-1900 reference period based on PAGES 2k Consortium (2019) 10-year smoothed multi-method reconstruction (Gillett et al., 2021; SPM1_1-2000.csv).
Data set: 1850-2020 global temperature of Gulev et al. (2021, their Fig. 2.11c) based on mean of four instrumental data sets (HadCRUT, NOAA, Berkeley Earth, Kadow) assessed by IPCC-AR6-WGI.
Available: https://doi.org/10.5281/zenodo.6321535 (Trewin, 2022; GMST-component_data_sets.csv).
Modified: None (1850-1900 reference period).
Data set: Global temperature projections to 2300 of Lee et al. (2021, their Fig. 4.40a) based on the MAGICC (v.7.5.0) emulator (Meinshausen et al., 2020) calibrated against the IPCC-AR6 assessed temperature to 2100.
Available: https://zenodo.org/record/6386979 (Nicholls et al., 2022; files with titles containing “fig-4-40” and respective SSP identifiers).
Modified: None (1850-1900 reference period).
References
Gillett, N. P., Malinina, E., Kaufman, D., Neukom, R.: Summary for Policymakers of the Working Group I contribution to the IPCC Sixth Assessment Report - data for Figure SPM.1 (v20210809). NERC EDS Centre for Environmental Data Analysis [data set], http://dx.doi.org/10.5285/76cad0b4f6f141ada1c44a4ce9e7d4bd, 2021.
Gulev, S. K., Thorne, P. W., Ahn, J., Dentener, F. J., Domingues, C. M., Gerland, S., Gong, D., Kaufman, D. S., Nnamchi, H.C., Quaas, J., Rivera, J. A., Sathyendranath, S., Smith, S.L., Trewin, B., von Shuckmann, K., and Vose, R. S.: Changing State of the Climate System, in: Climate Change 2021: 85 The Physical Science Basis. Contribution of Working Group I to the Sixth Assessment Report of the I…
Hansen J., Sato, M., Russell, G., and Kharecha, P.: Climate sensitivity, sea level and atmospheric carbon dioxide, Philos. T. Roy. Soc. A, 371, 20120294, https://doi.org/10.1098/rsta.2012.0294, 2013.
Kaufman, D., McKay, N., Routson, C., Erb, M., Davis, B., Heiri, O., Jaccard, S., Tierney, J., Dätwyler, C., Axford, Y., Brussel, T., Cartapanis, O., Chase, B., Dawson, A., de Vernal, A., Engels, S., Jonkers, L., Marsicek, J., Moffa-Sánchez, P., Morrill, C., Orsi, A., Rehfeld, K., Saunders, K., Sommer, P., Thomas, E., Tonello, M., Tóth, M., Vachula, R., Andreev, A., Bertrand, S., Biskaborn, B., Br…
Kaufman, D., McKay, N., Routson, C., Erb, M., Dätwyler, C., Sommer, P., Heiri, O., and Davis, B.: Holocene global surface temperature: A multi-method reconstruction approach, Scientific Data, 7, 201, https://doi.org/10.1038/s41597-020-0530-7, 2020b.
Kaufman, D., McKay, N., Routson, C., Erb, M., Dätwyler, C., Sommer, P., Heiri, O., and Davis, B.: NOAA/WDS Paleoclimatology – Holocene global surface temperature: A multi-method reconstruction approach, NOAA National Centers for Environmental Information [data set], https://doi.org/10.25921/vzys-1280, 2020c.
Lee, J. Y., Marotzke, J., Bala, G., Cao, L., Corti, S., Dunne, J. P., Engelbrecht, F., Fischer, E., Fyfe, J. C., Jones, C., Maycock, A., Mutemi, J., Ndiaye, O., Panickal, S., and Zhou, T.: Future Global Climate: Scenario-Based Projections and Near-Term Information, in: Climate Change 2021: The Physical Science Basis. Contribution of Working Group I to the Sixth Assessment Report of the Intergover…
Meinshausen, M., Nicholls, Z. R. J., Lewis, J., Gidden, M. J., Vogel, E., Freund, M., Beyerle, U., Gessner, C., Nauels, A., Bauer, N., Canadell, J. G., Daniel, J. S., John, A., Krummel, P. B., Luderer, G., Meinshausen, N., Montzka, S. A., Rayner, P. J., Reimann, S., Smith, S. J., van den Berg, M., Velders, G. J. M., Vollmer, M. K., and Wang, R. H. J.: The shared socio-economic pathway (SSP) green…
McKay, N. and Kaufman, D.: nickmckay/past-and-future-warming-comparison-figure code repository. (page proofs), Zenodo [code, data set], https://doi.org/10.5281/zenodo.6399351, 2022
Nicholls, Z., Meinshausen, M., and Lewis, J.: AR6 WG1 plots and processing (v1.0.0), Zenodo [data set], https://doi.org/10.5281/zenodo.6386979, 2022.
Osman, M. B., Tierney, J. E., Zhu, J., Tardif, R., Halkim, G. J., King, J., and Poulsen, C. J.: Globally resolved surface temperatures since the Last Glacial Maximum, Nature, 599, 239–244, https://doi.org/10.1038/s41586-021-03984-4, 2021a.
Osman, M. B., Tierney, J. E., Zhu, J., Tardif, R., Halkim, G. J., King, J., and Poulsen, C. J.: NOAA/WDS Paleoclimatology – Globally resolved surface temperatures since the Last Glacial Maximum, NOAA National Centers for Environmental Information [data set], https://doi.org/10.25921/njxd-hg08, 2021b.
PAGES 2k Consortium (Neukom, R., Barboza, L.A., Erb, M. P., Shi, F., Emile-Geay, J., Evans, M. N., Franke, J., Kaufman, D. S., Lücke, L., Rehfeld, K., Schurer, A., Zhu, F., Brönnimann, S., Hakim, G.J., Henley, B., Ljungqvist, F. C., McKay, N., Valler, V., von Gunten, L.): Consistent multi-decadal variability in global temperature reconstructions and simulations over the Common Era. Nature Geosci.…
Routson, C., McKay, N., Sommer, P. S., Dätwyler, C., and Erb, M.: nickmckay/Temperature12k: Analysis and plotting code for Temp12k Analysis Paper (1.2.0), Zenodo [code], 105 https://doi.org/10.5281/zenodo.3888590, 2020.
Snyder, C. W.: Evolution of global temperature over the past two million years, Nature, 538, 226–228, https://doi.org/10.1038/nature19798, 2016.
Trewin, B.: Global temperature time series from IPCC AR6, Zenodo [data set], https://doi.org/10.5281/zenodo.6321535, 2022.
Zachos, J.C., Dickens, G.R., and Zeebe, R.E.: An Early Cenozoic perspective on greenhouse warming and carbon-cycle dynamics. Nature 451, 279–283, https://doi.org/10.1038/nature06588, 2008.

## Sheet: Fig 1 data
Hansen -benthic stack				Snyder - SST stack				Kaufman - Temp12k					Osman - Data assimilation					AR6 four data set mean - Instrumental					AR6 SSP1-2.6 projection					AR6 SSP2-4.5 projection					AR6 SSP3-7.0 projection
Age (BP)	GST (°C)	Adjusted (–14.15 + 0.36°)		Age (BP)	∆GST (°C)	Adjusted (+ 0.23°)		Age (BP)	∆GST (°C) adjusted (–0.03°)	0.05	0.95		Age (BP)	∆GST (°C) adjusted (– 13.49° + 0.03°)	0.05	0.95		Year	∆GST (°C)	0.05	0.95		year	∆GST (°C)	0.05	0.95		year	∆GST (°C)	0.05	0.95		year	∆GST (°C)	0.05	0.95
0	14	0.21		1000	-0.174916	0.0550836		0	0.0576933	-0.2924	0.549471		100	0.03	-0.329258	0.367563		2020	1.25632	1.19881	1.30567		1850	-0.0380162	-0.160342	0.100271		1850	-0.0380162	-0.160342	0.100271		1850	-0.0380162	-0.160436	0.100178
1600	14.24	0.45		2000	-0.0932424	0.136758		100	-0.03	-0.372005	0.325638		300	-0.0757129	-0.404053	0.228047		2019	1.22632	1.16031	1.28417		1851	-0.00833719	-0.127401	0.125091		1851	-0.00833719	-0.127401	0.125091		1851	-0.00833719	-0.127495	0.124998
2400	14.37	0.58		3000	0.0274275	0.257427		200	0.02046	-0.319516	0.356743		500	-0.0744159	-0.389496	0.167967		2018	1.10132	1.04881	1.14567		1852	-0.00558169	-0.125635	0.128725		1852	-0.00558169	-0.125635	0.128725		1852	-0.00558169	-0.125728	0.128631
3200	14.37	0.58		4000	0.0820681	0.312068		300	-0.00501689	-0.343276	0.329186		700	-0.0261981	-0.342414	0.203972		2017	1.17882	1.12581	1.22717		1853	-0.00837499	-0.127117	0.124632		1853	-0.00837499	-0.127117	0.124632		1853	-0.00837499	-0.12721	0.124539
4000	14.02	0.23		5000	0.12975	0.35975		400	0.00491486	-0.346197	0.317519		900	0.0648511	-0.243329	0.348877		2016	1.26382	1.20731	1.31567		1854	-0.0253584	-0.143599	0.109918		1854	-0.0253584	-0.143599	0.109918		1854	-0.0253584	-0.143692	0.109825
4800	13.83	0.04		6000	0.136328	0.366328		500	0.00690129	-0.314304	0.309327		1100	0.027345	-0.261684	0.290999		2015	1.14882	1.09731	1.18578		1855	-0.0302802	-0.150429	0.107415		1855	-0.0302802	-0.150429	0.107415		1855	-0.0302802	-0.150522	0.107321
5400	14.04	0.25		7000	0.058979	0.288979		600	0.0428204	-0.270118	0.335221		1300	-0.0044696	-0.32558	0.274283		2014	1.00632	0.951814	1.03867		1856	-0.022376	-0.142143	0.114702		1856	-0.022376	-0.142143	0.114702		1856	-0.022376	-0.142236	0.114609
6200	14	0.21		8000	-0.0617949	0.168205		700	0.0440505	-0.257741	0.351816		1500	0.00142029	-0.338977	0.220201		2013	0.936324	0.864814	0.975784		1857	-0.023831	-0.142765	0.112439		1857	-0.023831	-0.142765	0.112439		1857	-0.023831	-0.142858	0.112345
7000	13.93	0.14		9000	-0.339057	-0.109057		800	0.0538186	-0.231557	0.344821		1700	-0.0499255	-0.383007	0.201207		2012	0.906324	0.841814	0.948667		1858	-0.0325567	-0.153511	0.104403		1858	-0.0325567	-0.153511	0.104403		1858	-0.0325567	-0.153605	0.104309
7800	14.2	0.41		10000	-0.74452	-0.51452		900	0.0543281	-0.247441	0.349331		1900	-0.0710742	-0.464987	0.188861		2011	0.881324	0.814667	0.925814		1859	-0.0219432	-0.14253	0.114631		1859	-0.0219432	-0.14253	0.114631		1859	-0.0219432	-0.142624	0.114538
8600	14.28	0.49		11000	-1.33158	-1.10158		1000	0.0842905	-0.21778	0.390281		2100	-0.0912769	-0.457732	0.205568		2010	0.996324	0.916314	1.04017		1860	-0.01079	-0.130551	0.124325		1860	-0.01079	-0.130551	0.124325		1860	-0.01079	-0.130644	0.124231
9600	13.46	-0.33		12000	-2.00481	-1.77481		1100	0.110306	-0.175319	0.440434		2300	-0.0998218	-0.478907	0.18117		2009	0.926324	0.847814	0.968667		1861	-0.00369937	-0.123684	0.131157		1861	-0.00369937	-0.123684	0.131157		1861	-0.00369937	-0.123777	0.131064
10400	13.21	-0.58		13000	-2.71415	-2.48415		1200	0.140855	-0.148811	0.481145		2500	-0.07672	-0.428261	0.2287		2008	0.796324	0.733314	0.830167		1862	-0.0228869	-0.140005	0.109871		1862	-0.0228869	-0.140005	0.109871		1862	-0.0228869	-0.140098	0.109778
11200	12.84	-0.95		14000	-3.44359	-3.21359		1300	0.149427	-0.102008	0.473953		2700	-0.137191	-0.477384	0.186342		2007	0.921324	0.847667	0.958814		1863	-0.0726815	-0.195327	0.0639059		1863	-0.0726815	-0.195327	0.0639059		1863	-0.0726815	-0.19542	0.0638126
11800	12.68	-1.11		15000	-4.11713	-3.88713		1400	0.107669	-0.145245	0.420058		2900	-0.151778	-0.53035	0.110315		2006	0.903824	0.841814	0.947167		1864	-0.0621311	-0.186934	0.0765849		1864	-0.0621311	-0.186934	0.0765849		1864	-0.0621311	-0.187027	0.0764916
12800	11.97	-1.82		16000	-4.70437	-4.47437		1500	0.100293	-0.161311	0.369249		3100	-0.171965	-0.548517	0.134507		2005	0.943824	0.881814	0.987167		1865	-0.0369146	-0.160315	0.0999831		1865	-0.0369146	-0.160315	0.0999831		1865	-0.0369146	-0.160408	0.0998898
13600	11.76	-2.03		17000	-5.27327	-5.04327		1600	0.0997641	-0.173958	0.378128		3300	-0.238585	-0.63096	0.0807278		2004	0.803824	0.736167	0.836618		1866	-0.0180711	-0.139785	0.116031		1866	-0.0180711	-0.139785	0.116031		1866	-0.0180711	-0.139878	0.115937
14800	10.92	-2.87		18000	-5.67317	-5.44317		1700	0.112634	-0.141795	0.434822		3500	-0.20259	-0.628629	0.0830258		2003	0.878824	0.814667	0.917314		1867	-0.00538692	-0.12535	0.127282		1867	-0.00538692	-0.12535	0.127282		1867	-0.00538692	-0.125444	0.127188
16000	10.64	-3.15		19000	-5.93189	-5.70189		1800	0.12159	-0.134687	0.430011		3700	-0.258132	-0.603585	0.0585629		2002	0.881324	0.806167	0.927314		1868	0.00150037	-0.118507	0.133682		1868	0.00150037	-0.118507	0.133682		1868	0.00150037	-0.1186	0.133589
17000	9.72	-4.07		20000	-6.14021	-5.91021		1900	0.105055	-0.154824	0.382622		3900	-0.244567	-0.637079	0.0606717		2001	0.811324	0.737814	0.845784		1869	0.0126765	-0.10616	0.144628		1869	0.0126765	-0.10616	0.144628		1869	0.0126765	-0.106254	0.144535
17600	9.49	-4.3		21000	-6.25758	-6.02758		2000	0.127204	-0.128726	0.392521		4100	-0.244948	-0.578949	0.0785031		2000	0.668824	0.611814	0.707167		1870	0.0189406	-0.0990998	0.150443		1870	0.0189406	-0.0990998	0.150443		1870	0.0189406	-0.0991931	0.15035
18400	9.35	-4.44		22000	-6.27741	-6.04741		2100	0.14333	-0.0979537	0.459499		4300	-0.239363	-0.593772	0.115435		1999	0.666324	0.603167	0.707314		1871	0.0251698	-0.0919523	0.156484		1871	0.0251698	-0.0919523	0.156484		1871	0.0251698	-0.0920457	0.156391
18800	9.56	-4.23		23000	-6.24992	-6.01992		2200	0.169327	-0.0557922	0.50342		4500	-0.186965	-0.555535	0.140031		1998	0.901324	0.817814	0.948667		1872	0.0306774	-0.085495	0.160269		1872	0.0306774	-0.085495	0.160269		1872	0.0306774	-0.0855883	0.160176
19500	9.46	-4.33		24000	-6.2296	-5.9996		2300	0.184391	-0.0391596	0.540073		4700	-0.167754	-0.511411	0.200595		1997	0.758824	0.686167	0.798814		1873	0.0259991	-0.0895515	0.154917		1873	0.0259991	-0.0895515	0.154917		1873	0.0259991	-0.0896448	0.154824
20500	9.83	-3.96		25000	-6.12387	-5.89387		2400	0.187893	-0.0426512	0.533917		4900	-0.157042	-0.548891	0.180456		1996	0.613824	0.537667	0.657314		1874	0.0105347	-0.104853	0.139791		1874	0.0105347	-0.104853	0.139791		1874	0.0105347	-0.104946	0.139697
21700	9.69	-4.1		26000	-5.96597	-5.73597		2500	0.193889	-0.0369816	0.58134		5100	-0.119445	-0.548096	0.204756		1995	0.726324	0.663167	0.767314		1875	0.0141037	-0.102096	0.144785		1875	0.0141037	-0.102096	0.144785		1875	0.0141037	-0.102189	0.144692
22500	9.9	-3.89		27000	-5.9355	-5.7055		2600	0.190448	-0.0448523	0.554819		5300	-0.190734	-0.589345	0.179484		1994	0.576324	0.513167	0.610314		1876	0.0152611	-0.100641	0.14615		1876	0.0152611	-0.100641	0.14615		1876	0.0152611	-0.100734	0.146057
23700	9.83	-3.96		28000	-5.88897	-5.65897		2700	0.198447	-0.0314359	0.583269		5500	-0.224333	-0.602111	0.107461		1993	0.521324	0.453167	0.560314		1877	0.0181294	-0.0981976	0.149926		1877	0.0181294	-0.0981976	0.149926		1877	0.0181294	-0.0982909	0.149833
24800	9.96	-3.83		29000	-5.91897	-5.68897		2800	0.216142	-0.0206966	0.623556		5700	-0.207274	-0.590468	0.113253		1992	0.473824	0.411667	0.510314		1878	0.0227772	-0.0945493	0.155569		1878	0.0227772	-0.0945493	0.155569		1878	0.0227772	-0.0946427	0.155476
25800	9.94	-3.85		30000	-5.83199	-5.60199		2900	0.239003	0.00540558	0.657877		5900	-0.199004	-0.567084	0.178242		1991	0.676324	0.606167	0.710314		1879	0.0264776	-0.0918452	0.159753		1879	0.0264776	-0.0918452	0.159753		1879	0.0264776	-0.0919386	0.15966
26600	10.14	-3.65		31000	-5.74032	-5.51032		3000	0.256939	0.0211267	0.684054		6100	-0.173506	-0.59328	0.176143		1990	0.698824	0.634667	0.730314		1880	0.0296922	-0.0880248	0.161578		1880	0.0296922	-0.0880248	0.161578		1880	0.0296922	-0.0881181	0.161485
27800	10.33	-3.46		32000	-5.63389	-5.40389		3100	0.269127	0.0492016	0.74481		6300	-0.176955	-0.557447	0.236625		1989	0.523824	0.488667	0.540314		1881	0.0309933	-0.0865549	0.162118		1881	0.0309933	-0.0865549	0.162118		1881	0.0309933	-0.0866482	0.162024
28700	10.43	-3.36		33000	-5.58019	-5.35019		3200	0.271982	0.0632402	0.744285		6500	-0.174086	-0.566408	0.18154		1988	0.633824	0.597167	0.656618		1882	0.0377648	-0.0796	0.167951		1882	0.0377648	-0.0796	0.167951		1882	0.0377648	-0.0796933	0.167857
29700	10.57	-3.22		34000	-5.56328	-5.33328		3300	0.278176	0.0578804	0.757575		6700	-0.210143	-0.597419	0.122357		1987	0.578824	0.523167	0.608814		1883	0.0308061	-0.083001	0.157978		1883	0.0308061	-0.083001	0.157978		1883	0.0308061	-0.0830943	0.157884
30700	10.52	-3.27		35000	-5.58137	-5.35137		3400	0.302894	0.0997944	0.784932		6900	-0.293532	-0.71124	0.090199		1986	0.441324	0.391667	0.468814		1884	-0.0528776	-0.170049	0.0813246		1884	-0.0528776	-0.170049	0.0813246		1884	-0.0528776	-0.170143	0.0812313
31700	10.71	-3.08		36000	-5.59108	-5.36108		3500	0.301519	0.0848162	0.855922		7100	-0.286559	-0.769141	0.0452435		1985	0.401324	0.350167	0.435118		1885	-0.161915	-0.310333	0.000857267		1885	-0.161915	-0.310333	0.000857267		1885	-0.161915	-0.310427	0.000763938
32400	10.41	-3.38		37000	-5.62122	-5.39122		3600	0.326604	0.102964	0.892226		7300	-0.408065	-0.810865	-0.0135883		1984	0.408824	0.375667	0.435118		1886	-0.120009	-0.258957	0.0351222		1886	-0.120009	-0.258957	0.0351222		1886	-0.120009	-0.25905	0.0350289
33500	10.51	-3.28		38000	-5.7164	-5.4864		3700	0.336205	0.110901	0.944442		7500	-0.409209	-0.825629	-0.0211917		1983	0.571324	0.528667	0.596618		1887	-0.0678728	-0.196887	0.0743496		1887	-0.0678728	-0.196887	0.0743496		1887	-0.0678728	-0.196981	0.0742562
34300	10.43	-3.36		39000	-5.75091	-5.52091		3800	0.344078	0.115172	0.896169		7700	-0.445983	-0.821274	-0.0476352		1982	0.396324	0.364167	0.425118		1888	-0.0402693	-0.164745	0.096551		1888	-0.0402693	-0.164745	0.096551		1888	-0.0402693	-0.164838	0.0964577
35100	10.64	-3.15		40000	-5.81135	-5.58135		3900	0.332074	0.102956	0.876923		7900	-0.40541	-0.789878	-0.0433932		1981	0.586324	0.531814	0.618667		1889	-0.0101118	-0.128451	0.122655		1889	-0.0101118	-0.128451	0.122655		1889	-0.0101118	-0.128545	0.122562
36300	10.45	-3.34		41000	-5.80441	-5.57441		4000	0.332222	0.100973	0.849945		8100	-0.405486	-0.792609	-0.012601		1980	0.541324	0.474667	0.578814		1890	0.0066194	-0.108984	0.13798		1890	0.0066194	-0.108984	0.13798		1890	0.0066194	-0.109077	0.137886
37600	10.72	-3.07		42000	-5.72722	-5.49722		4100	0.330897	0.106763	0.896239		8300	-0.441756	-0.83933	-0.0679263		1979	0.436324	0.398667	0.456618		1891	0.00681077	-0.107924	0.134592		1891	0.00681077	-0.107924	0.134592		1891	0.00681077	-0.108017	0.134499
38400	10.67	-3.12		43000	-5.6272	-5.3972		4200	0.331735	0.103829	0.880921		8500	-0.440413	-0.865076	-0.0334308		1978	0.348824	0.293167	0.376618		1892	0.00535513	-0.110473	0.13416		1892	0.00535513	-0.110473	0.13416		1892	0.00535513	-0.110566	0.134066
39400	10.84	-2.95		44000	-5.43086	-5.20086		4300	0.320587	0.101621	0.885768		8700	-0.57437	-1.02	-0.123764		1977	0.453824	0.391667	0.497314		1893	0.0277834	-0.0854278	0.155373		1893	0.0277834	-0.0854278	0.155373		1893	0.0277834	-0.0855212	0.15528
40400	10.82	-2.97		45000	-5.35092	-5.12092		4400	0.329552	0.118457	0.931109		8900	-0.60028	-1.02141	-0.19834		1976	0.148824	0.137196	0.167314		1894	0.048955	-0.0646817	0.173145		1894	0.048955	-0.0646817	0.173145		1894	0.048955	-0.0647751	0.173052
41100	10.86	-2.93		46000	-5.27944	-5.04944		4500	0.340431	0.12294	0.940915		9100	-0.592391	-1.02628	-0.190908		1975	0.241324	0.190167	0.270314		1895	0.0613585	-0.0528612	0.186524		1895	0.0613585	-0.0528612	0.186524		1895	0.0613585	-0.0529545	0.186431
41900	10.72	-3.07		47000	-5.30029	-5.07029		4600	0.351573	0.131354	0.94259		9300	-0.760817	-1.17513	-0.383777		1974	0.183824	0.130167	0.223618		1896	0.0709104	-0.0410126	0.191628		1896	0.0709104	-0.0410126	0.191628		1896	0.0709104	-0.0411059	0.191535
43000	10.79	-3		48000	-5.30382	-5.07382		4700	0.364818	0.153073	0.978278		9500	-0.896056	-1.35578	-0.460587		1973	0.403824	0.374784	0.433		1897	0.0753426	-0.0351123	0.196392		1897	0.0753426	-0.0351123	0.196392		1897	0.0753426	-0.0352056	0.196299
44200	10.86	-2.93		49000	-5.20691	-4.97691		4800	0.376483	0.148218	1.01499		9700	-0.918273	-1.36673	-0.49771		1972	0.261324	0.210167	0.302118		1898	0.0793494	-0.0312571	0.198333		1898	0.0793494	-0.0312571	0.198333		1898	0.0793494	-0.0313504	0.19824
45400	10.9	-2.89		50000	-5.11283	-4.88283		4900	0.393083	0.167803	1.06044		9900	-1.02527	-1.4004	-0.628595		1971	0.153824	0.124167	0.183618		1899	0.0822812	-0.0275037	0.201227		1899	0.0822812	-0.0275037	0.201227		1899	0.0822812	-0.0275971	0.201134
46500	10.93	-2.86		51000	-4.94614	-4.71614		5000	0.402132	0.172848	1.0666		10100	-1.17122	-1.58243	-0.766526		1970	0.273824	0.235667	0.319118		1900	0.0860038	-0.0222526	0.205383		1900	0.0860038	-0.0222526	0.205383		1900	0.0860038	-0.022346	0.20529
47500	10.93	-2.86		52000	-4.82839	-4.59839		5100	0.401694	0.180116	1.05044		10300	-1.20553	-1.64812	-0.801595		1969	0.313824	0.270167	0.336618		1901	0.0881374	-0.0199382	0.2053		1901	0.0881374	-0.0199382	0.2053		1901	0.0881374	-0.0200316	0.205207
48300	10.94	-2.85		53000	-4.80149	-4.57149		5200	0.408701	0.173959	1.06783		10500	-1.20482	-1.62859	-0.694086		1968	0.171324	0.120784	0.2045		1902	0.089565	-0.0185789	0.207396		1902	0.089565	-0.0185789	0.207396		1902	0.089565	-0.0186722	0.207302
49100	10.84	-2.95		54000	-4.79965	-4.56965		5300	0.42249	0.171805	1.11406		10700	-1.2684	-1.69162	-0.869223		1967	0.238824	0.197167	0.273618		1903	0.063255	-0.0416963	0.18095		1903	0.063255	-0.0416963	0.18095		1903	0.063255	-0.0417896	0.180856
49900	10.67	-3.12		55000	-4.87685	-4.64685		5400	0.416507	0.189007	1.10802		10900	-1.36595	-1.83083	-0.987097		1966	0.206324	0.158667	0.243618		1904	0.0075824	-0.10539	0.135383		1904	0.0075824	-0.10539	0.135383		1904	0.0075824	-0.105483	0.13529
50700	10.99	-2.8		56000	-4.92292	-4.69292		5500	0.421368	0.184042	1.11548		11100	-1.54166	-1.96528	-1.1083		1965	0.153824	0.117167	0.183618		1905	0.0241776	-0.0906999	0.149478		1905	0.0241776	-0.0906999	0.149478		1905	0.0241776	-0.0907932	0.149384
51300	11.06	-2.73		57000	-5.07899	-4.84899		5600	0.436164	0.20925	1.18476		11300	-1.80315	-2.29159	-1.33373		1964	0.0463235	0.0232843	0.073		1906	0.0576233	-0.0528145	0.178448		1906	0.0576233	-0.0528145	0.178448		1906	0.0576233	-0.0529078	0.178355
51900	11.2	-2.59		58000	-5.21384	-4.98384		5700	0.448236	0.196121	1.23602		11500	-2.10664	-2.57991	-1.65476		1963	0.296324	0.257784	0.3175		1907	0.0749996	-0.0293559	0.192373		1907	0.0749996	-0.0293559	0.192373		1907	0.0749996	-0.0294492	0.19228
52800	11.45	-2.34		59000	-5.46001	-5.23001		5800	0.46169	0.217077	1.25271		11700	-2.46103	-2.96694	-1.96161		1962	0.261324	0.226284	0.292314		1908	0.0773673	-0.0258481	0.194498		1908	0.0773673	-0.0258481	0.194498		1908	0.0773673	-0.0259414	0.194404
53400	11.56	-2.23		60000	-5.64624	-5.41624		5900	0.462636	0.216771	1.23254		11900	-2.8365	-3.31002	-2.39879		1961	0.308824	0.243784	0.346		1909	0.0897178	-0.0139247	0.207322		1909	0.0897178	-0.0139247	0.207322		1909	0.0897178	-0.014018	0.207229
54200	11.24	-2.55		61000	-5.79945	-5.56945		6000	0.483524	0.242515	1.26268		12100	-2.97989	-3.45396	-2.55904		1960	0.231324	0.197167	0.255118		1910	0.100924	-0.00187231	0.219234		1910	0.100924	-0.00187231	0.219234		1910	0.100924	-0.00196564	0.21914
55200	11.19	-2.6		62000	-5.89394	-5.66394		6100	0.497183	0.247557	1.33663		12300	-3.23837	-3.65404	-2.76018		1959	0.286324	0.248814	0.305784		1911	0.110321	0.00626943	0.22652		1911	0.110321	0.00626943	0.22652		1911	0.110321	0.0061761	0.226426
56000	11.39	-2.4		63000	-6.01382	-5.78382		6200	0.503366	0.26139	1.34537		12500	-3.42468	-3.84871	-2.97247		1958	0.306324	0.260314	0.334284		1912	0.10114	-0.00325714	0.215483		1912	0.10114	-0.00325714	0.215483		1912	0.10114	-0.00335047	0.21539
57000	11.09	-2.7		64000	-6.06193	-5.83193		6300	0.50212	0.248647	1.36664		12700	-3.52466	-3.92573	-3.12822		1957	0.296324	0.242284	0.326		1913	0.0567505	-0.0536266	0.174304		1913	0.0567505	-0.0536266	0.174304		1913	0.0567505	-0.05372	0.174211
58100	10.84	-2.95		65000	-6.11889	-5.88889		6400	0.507373	0.261813	1.33237		12900	-3.4638	-3.88891	-3.0423		1956	0.0763235	0.0122843	0.123		1914	0.0475363	-0.0683638	0.169887		1914	0.0475363	-0.0683638	0.169887		1914	0.0475363	-0.0684571	0.169794
59100	11	-2.79		66000	-5.98923	-5.75923		6500	0.503194	0.257955	1.3522		13100	-3.33841	-3.75318	-2.92279		1955	0.138824	0.0576667	0.185118		1915	0.0842473	-0.0275817	0.20403		1915	0.0842473	-0.0275817	0.20403		1915	0.0842473	-0.027675	0.203937
60500	11.12	-2.67		67000	-5.82235	-5.59235		6600	0.512816	0.270975	1.36632		13300	-3.33079	-3.76916	-2.93174		1954	0.196324	0.117814	0.235784		1916	0.117949	0.0129254	0.23125		1916	0.117949	0.0129254	0.23125		1916	0.117949	0.012832	0.231156
61900	10.92	-2.87		68000	-5.59489	-5.36489		6700	0.504623	0.264444	1.31012		13500	-3.47557	-3.86147	-3.06289		1953	0.388824	0.314814	0.434284		1917	0.140142	0.0384058	0.252087		1917	0.140142	0.0384058	0.252087		1917	0.140142	0.0383125	0.251993
62700	10.92	-2.87		69000	-5.33619	-5.10619		6800	0.4963	0.255566	1.29724		13700	-3.60579	-4.034	-3.21298		1952	0.323824	0.239314	0.372784		1918	0.155335	0.0535861	0.266264		1918	0.155335	0.0535861	0.266264		1918	0.155335	0.0534928	0.266171
63500	11.09	-2.7		70000	-5.03196	-4.80196		6900	0.489547	0.237008	1.28158		13900	-3.71594	-4.15356	-3.32028		1951	0.251324	0.176784	0.293814		1919	0.166674	0.0667603	0.273245		1919	0.166674	0.0667603	0.273245		1919	0.166674	0.066667	0.273152
64300	10.76	-3.03		71000	-4.61392	-4.38392		7000	0.482071	0.236212	1.26848		14100	-3.90636	-4.35288	-3.45654		1950	0.0963235	0.0492843	0.125314		1920	0.172423	0.0747394	0.276253		1920	0.172423	0.0747394	0.276253		1920	0.172423	0.0746461	0.27616
65100	10.74	-3.05		72000	-4.30832	-4.07832		7100	0.480502	0.222452	1.27396		14300	-4.09979	-4.61487	-3.66519		1949	0.173824	0.119284	0.213814		1921	0.179813	0.0843125	0.282941		1921	0.179813	0.0843125	0.282941		1921	0.179813	0.0842192	0.282848
66100	10.77	-3.02		73000	-4.00551	-3.77551		7200	0.464029	0.200567	1.23167		14500	-4.32687	-4.83505	-3.81935		1948	0.181324	0.110784	0.233814		1922	0.18376	0.0891298	0.284796		1922	0.18376	0.0891298	0.284796		1922	0.18376	0.0890365	0.284703
67400	11.11	-2.68		74000	-3.69548	-3.46548		7300	0.447563	0.196347	1.20789		14700	-4.56697	-5.0749	-4.08352		1947	0.241324	0.176167	0.270314		1923	0.175799	0.079877	0.277492		1923	0.175799	0.079877	0.277492		1923	0.175799	0.0797837	0.277398
68900	11.35	-2.44		75000	-3.29754	-3.06754		7400	0.440621	0.158044	1.16242		14900	-4.79893	-5.3111	-4.26023		1946	0.196324	0.140784	0.233814		1924	0.182439	0.0878729	0.284937		1924	0.182439	0.0878729	0.284937		1924	0.182439	0.0877796	0.284844
70300	11.67	-2.12		76000	-2.96669	-2.73669		7500	0.417134	0.137142	1.12538		15100	-5.05517	-5.64824	-4.53401		1945	0.348824	0.311314	0.392784		1925	0.193788	0.100573	0.294159		1925	0.193788	0.100573	0.294159		1925	0.193788	0.10048	0.294066
71500	11.91	-1.88		77000	-2.78789	-2.55789		7600	0.408546	0.136724	1.05865		15300	-5.35344	-5.9363	-4.76075		1944	0.471324	0.413314	0.500167		1926	0.202521	0.110102	0.302009		1926	0.202521	0.110102	0.302009		1926	0.202521	0.110008	0.301916
72900	11.9	-1.89		78000	-2.60503	-2.37503		7700	0.400768	0.109789	1.03091		15500	-5.55762	-6.18614	-5.02679		1943	0.348824	0.284667	0.380314		1927	0.20957	0.117839	0.308177		1927	0.20957	0.117839	0.308177		1927	0.20957	0.117746	0.308084
74000	11.79	-2		79000	-2.47422	-2.24422		7800	0.390816	0.125433	0.977529		15700	-5.76417	-6.46908	-5.15597		1942	0.321324	0.270784	0.353814		1928	0.212933	0.121516	0.310741		1928	0.212933	0.121516	0.310741		1928	0.212933	0.121423	0.310647
75000	11.83	-1.96		80000	-2.36024	-2.13024		7900	0.372887	0.0907539	0.920897		15900	-6.07829	-6.78863	-5.35922		1941	0.356324	0.318118	0.395696		1929	0.209031	0.119388	0.308256		1929	0.209031	0.119388	0.308256		1929	0.209031	0.119295	0.308162
76600	12.09	-1.7		81000	-2.3118	-2.0818		8000	0.355961	0.0941623	0.867319		16100	-6.26948	-7.03445	-5.66486		1940	0.371324	0.325814	0.426784		1930	0.199245	0.110541	0.300544		1930	0.199245	0.110541	0.300544		1930	0.199245	0.110447	0.300451
77800	12.31	-1.48		82000	-2.33629	-2.10629		8100	0.346719	0.0863167	0.838199		16300	-6.4099	-7.18761	-5.79479		1939	0.271324	0.195284	0.315314		1931	0.213166	0.12337	0.312901		1931	0.213166	0.12337	0.312901		1931	0.213166	0.123276	0.312807
78600	12.68	-1.11		83000	-2.34479	-2.11479		8200	0.322625	0.0619708	0.802606		16500	-6.58679	-7.36809	-5.89212		1938	0.286324	0.198284	0.342314		1932	0.21561	0.125643	0.314981		1932	0.21561	0.125643	0.314981		1932	0.21561	0.12555	0.314887
79400	12.74	-1.05		84000	-2.38759	-2.15759		8300	0.30881	0.0652875	0.754243		16700	-6.91844	-7.68	-6.15908		1937	0.283824	0.196784	0.335314		1933	0.212368	0.123271	0.313837		1933	0.212368	0.123271	0.313837		1933	0.212368	0.123177	0.313744
80600	12.65	-1.14		85000	-2.55976	-2.32976		8400	0.29616	0.0379036	0.721954		16900	-7.15448	-7.87628	-6.37712		1936	0.136324	0.0637843	0.183814		1934	0.218783	0.129593	0.317756		1934	0.218783	0.129593	0.317756		1934	0.218783	0.129499	0.317663
81200	12.7	-1.09		86000	-2.71603	-2.48603		8500	0.293841	0.0321654	0.70498		17100	-7.24063	-8.11327	-6.5546		1935	0.0888235	0.0277843	0.142314		1935	0.228303	0.13977	0.32513		1935	0.228303	0.13977	0.32513		1935	0.228303	0.139677	0.325037
82000	12.53	-1.26		87000	-2.85288	-2.62288		8600	0.282583	0.026402	0.702199		17300	-7.36029	-8.17523	-6.56558		1934	0.136324	0.0707843	0.183814		1936	0.238781	0.153833	0.33652		1936	0.238781	0.153833	0.33652		1936	0.238781	0.15374	0.336426
83200	12.07	-1.72		88000	-2.88686	-2.65686		8700	0.268876	0.0152024	0.674908		17500	-7.29217	-8.12311	-6.57365		1933	-0.0111765	-0.0692157	0.0323137		1937	0.248765	0.164178	0.344945		1937	0.248765	0.164178	0.344945		1937	0.248765	0.164084	0.344851
84600	12.17	-1.62		89000	-2.82212	-2.59212		8800	0.262385	0.0182018	0.647129		17700	-7.38213	-8.21019	-6.54725		1932	0.153824	0.0682843	0.203814		1938	0.259032	0.174111	0.353254		1938	0.259032	0.174111	0.353254		1938	0.259032	0.174018	0.353161
85600	12.29	-1.5		90000	-2.81908	-2.58908		8900	0.260347	-0.00114151	0.655983		17900	-7.39487	-8.13563	-6.52827		1931	0.198824	0.125284	0.250814		1939	0.264263	0.180108	0.357182		1939	0.264263	0.180108	0.357182		1939	0.264263	0.180015	0.357088
86800	12.16	-1.63		91000	-2.76867	-2.53867		9000	0.253106	0.0119124	0.641549		18100	-7.26742	-8.05702	-6.57515		1930	0.136324	0.0737843	0.173814		1940	0.26825	0.185332	0.360207		1940	0.26825	0.185332	0.360207		1940	0.26825	0.185239	0.360114
87900	12.06	-1.73		92000	-2.68027	-2.45027		9100	0.252435	-0.00462755	0.60851		18300	-7.21046	-7.91992	-6.4711		1929	-0.0711765	-0.120716	-0.0361863		1941	0.27033	0.187687	0.362758		1941	0.27033	0.187687	0.362758		1941	0.27033	0.187593	0.362664
88700	12.08	-1.71		93000	-2.59983	-2.36983		9200	0.243485	-0.0171354	0.602516		18500	-7.27998	-7.96132	-6.54225		1928	0.0913235	0.0163137	0.141284		1942	0.26991	0.187238	0.362547		1942	0.26991	0.187238	0.362547		1942	0.26991	0.187145	0.362454
89500	12.23	-1.56		94000	-2.42282	-2.19282		9300	0.235644	-0.0242005	0.613737		18700	-7.17483	-7.92193	-6.49495		1927	0.0813235	0.00678431	0.123814		1943	0.270366	0.186731	0.363232		1943	0.270366	0.186731	0.363232		1943	0.270366	0.186638	0.363139
90300	12.2	-1.59		95000	-2.24108	-2.01108		9400	0.228031	-0.0347123	0.604255		18900	-7.11604	-7.8742	-6.47682		1926	0.186324	0.107814	0.232784		1944	0.271049	0.186205	0.364197		1944	0.271049	0.186205	0.364197		1944	0.271049	0.186112	0.364104
91100	12.14	-1.65		96000	-2.07183	-1.84183		9500	0.214089	-0.0643327	0.573602		19100	-7.03911	-7.79177	-6.39702		1925	0.0563235	-0.0138333	0.0951176		1945	0.27914	0.193794	0.371947		1945	0.27914	0.193794	0.371947		1945	0.27914	0.193701	0.371854
92200	12.37	-1.42		97000	-1.88621	-1.65621		9600	0.204489	-0.100184	0.547725		19300	-7.03918	-7.74609	-6.36823		1924	0.0188235	-0.0377157	0.0475		1946	0.290381	0.208362	0.382096		1946	0.290381	0.208362	0.382096		1946	0.290381	0.208268	0.382003
93200	12.85	-0.94		98000	-1.71578	-1.48578		9700	0.179716	-0.143904	0.500674		19500	-7.0836	-7.84215	-6.43665		1923	0.0163235	-0.0538333	0.0503137		1947	0.298794	0.216467	0.388861		1947	0.298794	0.216467	0.388861		1947	0.298794	0.216374	0.388768
94200	12.65	-1.14		99000	-1.60899	-1.37899		9800	0.149746	-0.229961	0.484065		19700	-7.10869	-7.87424	-6.49288		1922	-0.00867647	-0.0581863	0.0157843		1948	0.303164	0.221247	0.39215		1948	0.303164	0.221247	0.39215		1948	0.303164	0.221154	0.392057
95100	12.71	-1.08		100000	-1.55112	-1.32112		9900	0.12484	-0.306148	0.440484		19900	-7.15126	-7.79265	-6.44338		1921	0.0738235	0.0118137	0.114284		1949	0.307689	0.226199	0.39596		1949	0.307689	0.226199	0.39596		1949	0.307689	0.226105	0.395867
96100	12.88	-0.91		101000	-1.49651	-1.26651		10000	0.0936831	-0.431203	0.408197		20100	-7.07693	-7.73561	-6.31383		1920	0.0338235	-0.0602157	0.1		1950	0.303125	0.22253	0.391505		1950	0.303125	0.22253	0.391505		1950	0.303125	0.222437	0.391412
96900	12.85	-0.94		102000	-1.56491	-1.33491		10100	0.0631797	-0.484907	0.38126		20300	-7.05191	-7.80288	-6.28391		1919	-0.00617647	-0.0607157	0.0275		1951	0.297413	0.214856	0.387864		1951	0.297413	0.214856	0.387864		1951	0.297413	0.214763	0.387771
97900	12.57	-1.22		103000	-1.59589	-1.36589		10200	0.0384639	-0.551842	0.345443		20500	-7.08078	-7.75576	-6.30438		1918	-0.0611765	-0.102833	-0.0263824		1952	0.292137	0.208597	0.383603		1952	0.292137	0.208597	0.383603		1952	0.292137	0.208504	0.383509
98800	12.77	-1.02		104000	-1.74845	-1.51845		10300	0.015913	-0.595656	0.339385		20700	-7.05875	-7.79535	-6.30745		1917	-0.213676	-0.255216	-0.1825		1953	0.28922	0.205522	0.38154		1953	0.28922	0.205522	0.38154		1953	0.28922	0.205428	0.381447
99700	12.74	-1.05		105000	-1.82455	-1.59455		10400	-0.0178388	-0.756258	0.302278		20900	-7.06601	-7.78403	-6.38313		1916	-0.0861765	-0.130716	-0.0625		1954	0.28832	0.202759	0.382864		1954	0.28832	0.202759	0.382864		1954	0.28832	0.202665	0.382771
100900	12.85	-0.94		106000	-1.93586	-1.70586		10500	-0.0470824	-0.859911	0.272472		21100	-7.06354	-7.70631	-6.3617		1915	0.136324	0.0822843	0.165314		1955	0.289585	0.203634	0.387167		1955	0.289585	0.203634	0.387167		1955	0.289585	0.203541	0.387074
101900	13.01	-0.78		107000	-2.05979	-1.82979		10600	-0.102138	-1.04449	0.210899		21300	-6.94746	-7.7314	-6.16885		1914	0.0788235	0.0392843	0.0975		1956	0.293055	0.208305	0.388929		1956	0.293055	0.208305	0.388929		1956	0.293055	0.208212	0.388836
102700	13.06	-0.73		108000	-2.15431	-1.92431		10700	-0.150885	-1.22142	0.176941		21500	-6.91511	-7.56901	-6.08868		1913	-0.113676	-0.144333	-0.0911863		1957	0.29865	0.211401	0.396461		1957	0.29865	0.211401	0.396461		1957	0.29865	0.211308	0.396367
103800	12.85	-0.94		109000	-2.21836	-1.98836		10800	-0.201341	-1.36945	0.128271		21700	-6.85391	-7.55491	-6.10898		1912	-0.136176	-0.157186	-0.119833		1958	0.310253	0.223944	0.40826		1958	0.310253	0.223944	0.40826		1958	0.310253	0.22385	0.408166
105200	12.91	-0.88		110000	-2.22991	-1.99991		10900	-0.257079	-1.52307	0.0694388		21900	-6.82194	-7.58694	-6.10483		1911	-0.208676	-0.235686	-0.185716		1959	0.318432	0.233902	0.413407		1959	0.318432	0.233902	0.413407		1959	0.318432	0.233809	0.413314
106200	12.72	-1.07		111000	-1.92866	-1.69866		11000	-0.299304	-1.77651	0.00534256		22100	-6.77321	-7.51377	-6.04984		1910	-0.191176	-0.223716	-0.1725		1960	0.322739	0.238974	0.417293		1960	0.322739	0.238974	0.417293		1960	0.322739	0.238881	0.4172
107200	12.53	-1.26		112000	-1.52283	-1.29283		11100	-0.374789	-2.0055	-0.0508509		22300	-6.64842	-7.43227	-5.89215		1909	-0.221176	-0.255216	-0.187686		1961	0.309288	0.222369	0.404659		1961	0.309288	0.222369	0.404659		1961	0.309288	0.222275	0.404565
108800	12.41	-1.38		113000	-1.11891	-0.888909		11200	-0.437156	-2.21197	-0.127101		22500	-6.58084	-7.30062	-5.84664		1908	-0.173676	-0.219216	-0.1525		1962	0.298829	0.208616	0.396914		1962	0.298829	0.208616	0.396914		1962	0.298829	0.208523	0.39682
110000	12.58	-1.21		114000	-0.768125	-0.538125		11300	-0.504778	-2.43137	-0.180859		22700	-6.43898	-7.16871	-5.7543		1907	-0.133676	-0.157333	-0.113382		1963	0.25873	0.165698	0.359088		1963	0.25873	0.165698	0.359088		1963	0.25873	0.165605	0.358995
111000	12.51	-1.28		115000	-0.479427	-0.249427		11400	-0.569282	-2.75764	-0.237646		22900	-6.43782	-7.04524	-5.72742		1906	0.0238235	-0.0207157	0.0545		1964	0.202665	0.100046	0.307944		1964	0.202665	0.100046	0.307944		1964	0.202665	0.0999526	0.30785
112000	12.85	-0.94		116000	-0.122452	0.107548		11500	-0.634445	-3.07531	-0.303579		23100	-6.36626	-7.11782	-5.63103		1905	-0.0536765	-0.0673333	-0.0433824		1965	0.182879	0.0711625	0.293991		1965	0.182879	0.0711625	0.293991		1965	0.182879	0.0710692	0.293897
113000	13.06	-0.73		117000	0.278968	0.508968		11600	-0.723769	-3.43562	-0.386562		23300	-6.29573	-7.03499	-5.47049		1904	-0.238676	-0.257333	-0.223382		1966	0.2042	0.0951741	0.317278		1966	0.2042	0.0951741	0.317278		1966	0.2042	0.0950808	0.317185
113700	13.24	-0.55		118000	0.673345	0.903345		11700	-0.825244	-3.74828	-0.459677		23500	-6.30896	-6.92013	-5.64383		1903	-0.168676	-0.181	-0.152716		1967	0.239262	0.129771	0.34822		1967	0.239262	0.129771	0.34822		1967	0.239262	0.129677	0.348126
114500	13.39	-0.4		119000	1.09971	1.32971		11800	-0.913492	-4.08555	-0.532344		23700	-6.18506	-6.92627	-5.51831		1902	-0.0786765	-0.091	-0.0693039		1968	0.250409	0.139524	0.356202		1968	0.250409	0.139524	0.356202		1968	0.250409	0.13943	0.356109
115500	13.16	-0.63		120000	1.54239	1.77239		11900	-1.00215	-4.585	-0.537236		23900	-6.09305	-6.78814	-5.44023		1901	0.0638235	0.0441667	0.0788137		1969	0.270802	0.161691	0.37607		1969	0.270802	0.161691	0.37607		1969	0.270802	0.161597	0.375977
116500	12.97	-0.82		121000	1.84996	2.07996		12000	-1.08682	-4.93621	-0.601804							1900	0.116324	0.0828137	0.155667		1970	0.289362	0.180236	0.394198		1970	0.289362	0.180236	0.394198		1970	0.289362	0.180142	0.394105
117500	13.39	-0.4		122000	1.98296	2.21296												1899	0.0163235	-0.00280392	0.0458137		1971	0.305653	0.19691	0.408727		1971	0.305653	0.19691	0.408727		1971	0.305653	0.196817	0.408634
118400	13.67	-0.12		123000	1.99167	2.22167												1898	-0.113676	-0.141	-0.0687157		1972	0.310872	0.199985	0.417366		1972	0.310872	0.199985	0.417366		1972	0.310872	0.199891	0.417273
119200	13.77	-0.02		124000	1.78139	2.01139												1897	0.0888235	0.0710294	0.100167		1973	0.334076	0.224164	0.440179		1973	0.334076	0.224164	0.440179		1973	0.334076	0.224071	0.440086
119900	14.52	0.73		125000	1.49479	1.72479												1896	0.0888235	0.0772843	0.106814		1974	0.358798	0.252015	0.463832		1974	0.358798	0.252015	0.463832		1974	0.358798	0.251922	0.463738
120500	15.51	1.72		126000	1.18419	1.41419												1895	-0.0586765	-0.101	-0.0123039		1975	0.367473	0.262524	0.468898		1975	0.367473	0.262524	0.468898		1975	0.367473	0.262431	0.468805
121500	14.89	1.1		127000	0.747626	0.977626												1894	-0.101176	-0.1395	-0.0627157		1976	0.35549	0.249137	0.456989		1976	0.35549	0.249137	0.456989		1976	0.35549	0.249044	0.456896
122400	15.07	1.28		128000	0.266593	0.496593												1893	-0.118676	-0.147333	-0.0841863		1977	0.383434	0.277397	0.486847		1977	0.383434	0.277397	0.486847		1977	0.383434	0.277304	0.486754
123600	15.56	1.77		129000	-0.295272	-0.0652718												1892	-0.121176	-0.151686	-0.0912157		1978	0.420307	0.315485	0.52098		1978	0.420307	0.315485	0.52098		1978	0.420307	0.315391	0.520887
124500	14.27	0.48		130000	-0.939993	-0.709993												1891	-0.0386765	-0.051	-0.0227157		1979	0.456385	0.35943	0.553163		1979	0.456385	0.35943	0.553163		1979	0.456385	0.359337	0.553069
125500	13.59	-0.2		131000	-1.73675	-1.50675												1890	-0.146176	-0.153186	-0.132716		1980	0.483913	0.389386	0.576743		1980	0.483913	0.389386	0.576743		1980	0.483913	0.389293	0.57665
126300	13.31	-0.48		132000	-2.32707	-2.09707												1889	0.111324	0.0841667	0.137314		1981	0.505655	0.415438	0.593066		1981	0.505655	0.415438	0.593066		1981	0.505655	0.415345	0.592973
127600	12.93	-0.86		133000	-2.91184	-2.68184												1888	-0.0111765	-0.031	0.00919608		1982	0.501534	0.414059	0.585265		1982	0.501534	0.414059	0.585265		1982	0.501534	0.413966	0.585172
128600	11.84	-1.95		134000	-3.53494	-3.30494												1887	-0.168676	-0.200382	-0.140333		1983	0.474444	0.38139	0.562108		1983	0.474444	0.38139	0.562108		1983	0.474444	0.381297	0.562015
129800	11.83	-1.96		135000	-4.10453	-3.87453												1886	-0.113676	-0.158186	-0.0658039		1984	0.435664	0.333316	0.529934		1984	0.435664	0.333316	0.529934		1984	0.435664	0.333223	0.52984
131000	11.44	-2.35		136000	-4.55049	-4.32049												1885	-0.133676	-0.151971	-0.114216		1985	0.465702	0.36202	0.561341		1985	0.465702	0.36202	0.561341		1985	0.465702	0.361927	0.561247
132400	10.73	-3.06		137000	-4.82809	-4.59809												1884	-0.128676	-0.146833	-0.113471		1986	0.503542	0.408495	0.59159		1986	0.503542	0.408495	0.59159		1986	0.503542	0.408401	0.591497
133400	9.98	-3.81		138000	-5.00326	-4.77326												1883	-0.00117647	-0.0328333	0.0166176		1987	0.528099	0.439441	0.610342		1987	0.528099	0.439441	0.610342		1987	0.528099	0.439348	0.610249
134400	9.91	-3.88		139000	-5.12543	-4.89543												1882	0.0638235	0.0572843	0.0698137		1988	0.563477	0.481711	0.639338		1988	0.563477	0.481711	0.639338		1988	0.563477	0.481617	0.639244
135400	9.86	-3.93		140000	-5.1864	-4.9564												1881	0.116324	0.0692843	0.153		1989	0.608486	0.533297	0.677625		1989	0.608486	0.533297	0.677625		1989	0.608486	0.533204	0.677532
136800	9.63	-4.16		141000	-5.24932	-5.01932												1880	0.0313235	0.0102843	0.063		1990	0.642705	0.574564	0.703762		1990	0.642705	0.574564	0.703762		1990	0.642705	0.574471	0.703668
137800	9.87	-3.92		142000	-5.2364	-5.0064												1879	0.0838235	0.0601961	0.112118		1991	0.63016	0.568944	0.682732		1991	0.63016	0.568944	0.682732		1991	0.63016	0.568851	0.682639
138600	9.97	-3.82		143000	-5.33627	-5.10627												1878	0.331324	0.261814	0.392667		1992	0.561165	0.483132	0.627995		1992	0.561165	0.483132	0.627995		1992	0.561165	0.483039	0.627902
139600	9.95	-3.84		144000	-5.48265	-5.25265												1877	0.271324	0.234167	0.321314		1993	0.447916	0.318936	0.550776		1993	0.447916	0.318936	0.550776		1993	0.447916	0.318843	0.550682
140400	9.93	-3.86		145000	-5.57503	-5.34503												1876	-0.0436765	-0.0612157	-0.0301863		1994	0.470792	0.338494	0.573201		1994	0.470792	0.338494	0.573201		1994	0.470792	0.338401	0.573108
141000	10.13	-3.66		146000	-5.71183	-5.48183												1875	-0.00617647	-0.0283333	0.0375294		1995	0.548173	0.453378	0.629311		1995	0.548173	0.453378	0.629311		1995	0.548173	0.453285	0.629217
141800	10.14	-3.65		147000	-5.79444	-5.56444												1874	-0.0211765	-0.0286863	-0.0142157		1996	0.611225	0.536869	0.674245		1996	0.611225	0.536869	0.674245		1996	0.611225	0.536776	0.674152
142600	10.17	-3.62		148000	-5.81611	-5.58611												1873	0.0163235	-0.00583333	0.0373137		1997	0.63855	0.578133	0.693531		1997	0.63855	0.578133	0.693531		1997	0.63855	0.578039	0.693438
143300	10.1	-3.69		149000	-5.53601	-5.30601												1872	0.0238235	0.0117843	0.036		1998	0.677114	0.619485	0.727951		1998	0.677114	0.619485	0.727951		1998	0.677114	0.619392	0.727858
144100	10.25	-3.54		150000	-5.45451	-5.22451												1871	-0.00617647	-0.0183333	0.00831373		1999	0.728532	0.681343	0.767196		1999	0.728532	0.681343	0.767196		1999	0.728532	0.68125	0.767103
144900	10	-3.79		151000	-5.28496	-5.05496												1870	0.0213235	0.0180294	0.0257843		2000	0.77168	0.735492	0.799844		2000	0.77168	0.735492	0.799844		2000	0.77168	0.735398	0.799751
145700	9.93	-3.86		152000	-5.23833	-5.00833												1869	0.0588235	0.0401961	0.0703137		2001	0.803759	0.776211	0.832159		2001	0.803759	0.776211	0.832159		2001	0.803759	0.776118	0.832066
146500	9.98	-3.81		153000	-5.33982	-5.10982												1868	0.0613235	0.0116961	0.100314		2002	0.825027	0.800793	0.85068		2002	0.825027	0.800793	0.85068		2002	0.825027	0.8007	0.850586
147200	10.04	-3.75		154000	-5.21072	-4.98072												1867	0.0488235	-0.00280392	0.114314		2003	0.843209	0.824386	0.864489		2003	0.843209	0.824386	0.864489		2003	0.843209	0.824293	0.864396
148000	9.59	-4.2		155000	-5.12962	-4.89962												1866	0.0513235	0.0183137	0.0876961		2004	0.858175	0.844396	0.876069		2004	0.858175	0.844396	0.876069		2004	0.858175	0.844302	0.875975
148600	9.72	-4.07		156000	-5.11794	-4.88794												1865	0.0338235	0.0268137	0.0472843		2005	0.870535	0.858295	0.887231		2005	0.870535	0.858295	0.887231		2005	0.870535	0.858202	0.887138
149200	9.94	-3.85		157000	-5.27421	-5.04421												1864	-0.0486765	-0.103716	-0.0116863		2006	0.884597	0.872318	0.900902		2006	0.884597	0.872318	0.900902		2006	0.884597	0.872225	0.900809
150000	9.98	-3.81		158000	-5.20103	-4.97103												1863	0.00132353	-0.0406863	0.0281667		2007	0.900233	0.885116	0.918585		2007	0.900233	0.885116	0.918585		2007	0.900233	0.885023	0.918492
150800	10.13	-3.66		159000	-5.12123	-4.89123												1862	-0.153676	-0.222333	-0.0879706		2008	0.926559	0.905387	0.950894		2008	0.926559	0.905387	0.950894		2008	0.926559	0.905294	0.950801
151600	10.3	-3.49		160000	-5.09052	-4.86052												1861	-0.0911765	-0.137833	-0.0701863		2009	0.952774	0.923879	0.985435		2009	0.952774	0.923879	0.985435		2009	0.952774	0.923786	0.985342
152600	10.39	-3.4																1860	-0.0561765	-0.0681863	-0.0373039		2010	0.973036	0.938323	1.01315		2010	0.973036	0.938323	1.01315		2010	0.973036	0.938229	1.01305
153600	10.53	-3.26																1859	0.0688235	0.0511176	0.0796667		2011	1.005	0.963564	1.05273		2011	1.005	0.963564	1.05273		2011	1.005	0.963471	1.05264
154400	10.5	-3.29																1858	-0.0386765	-0.0482157	-0.0325		2012	1.03124	0.981599	1.08673		2012	1.03124	0.981599	1.08673		2012	1.03124	0.981506	1.08664
155400	10.55	-3.24																1857	-0.146176	-0.200686	-0.110333		2013	1.0631	1.00445	1.12953		2013	1.0631	1.00445	1.12953		2013	1.0631	1.00436	1.12944
156300	10.65	-3.14																1856	-0.0511765	-0.0897157	0.0218137		2014	1.08936	1.02279	1.16795		2014	1.08936	1.02279	1.16795		2014	1.08936	1.02269	1.16786
157300	10.64	-3.15																1855	0.0488235	0.0402843	0.0575		2015	1.11187	1.04005	1.19757		2015	1.11181	1.03998	1.1975		2015	1.11152	1.03952	1.19706
158100	10.45	-3.34																1854	0.0488235	0.0251961	0.0653137		2016	1.13388	1.05573	1.2298		2016	1.13325	1.05543	1.22959		2016	1.1307	1.05294	1.22556
159100	10.37	-3.42																1853	0.0463235	0.0281176	0.0796961		2017	1.15708	1.0707	1.26095		2017	1.15609	1.0697	1.25665		2017	1.15082	1.06705	1.25119
159900	10.47	-3.32																1852	0.0788235	0.0436961	0.120814		2018	1.18141	1.08906	1.29339		2018	1.18058	1.08608	1.2939		2018	1.17284	1.0833	1.28078
161000	10.61	-3.18																1851	0.0488235	0.00181373	0.116696		2019	1.20647	1.10433	1.32675		2019	1.20629	1.10229	1.32985		2019	1.19637	1.0995	1.31384
																		1850	-0.0586765	-0.0803824	-0.0263333		2020	1.23278	1.12119	1.36248		2020	1.23284	1.12112	1.36868		2020	1.22209	1.11686	1.35084
																							2021	1.26205	1.13946	1.4024		2021	1.26117	1.141	1.4078		2021	1.25191	1.13794	1.39145
																							2022	1.29366	1.15714	1.44716		2022	1.29161	1.16208	1.44807		2022	1.2848	1.16202	1.43254
																							2023	1.32477	1.17434	1.49313		2023	1.32175	1.18226	1.48846		2023	1.31789	1.18685	1.47549
																							2024	1.35366	1.18976	1.53901		2024	1.34997	1.20005	1.52699		2024	1.34957	1.20963	1.51897
																							2025	1.37838	1.20172	1.57767		2025	1.37426	1.21522	1.56195		2025	1.37792	1.2283	1.55806
																							2026	1.40074	1.21237	1.61274		2026	1.39635	1.2313	1.59184		2026	1.40468	1.2458	1.59361
																							2027	1.4214	1.22175	1.64467		2027	1.41697	1.24547	1.62237		2027	1.43055	1.26488	1.62836
																							2028	1.44222	1.23152	1.67655		2028	1.43799	1.26002	1.65285		2028	1.45735	1.28354	1.66288
																							2029	1.46258	1.24114	1.70606		2029	1.45885	1.27409	1.67697		2029	1.48444	1.3025	1.69643
																							2030	1.48214	1.25087	1.73476		2030	1.48061	1.28889	1.70527		2030	1.51236	1.32146	1.7323
																							2031	1.50012	1.26026	1.76262		2031	1.50386	1.30439	1.73724		2031	1.54116	1.34127	1.77203
																							2032	1.51851	1.2704	1.79509		2032	1.52877	1.32139	1.77047		2032	1.5715	1.36422	1.80992
																							2033	1.5392	1.28179	1.82732		2033	1.55663	1.33986	1.80584		2033	1.60488	1.38729	1.85154
																							2034	1.5629	1.29464	1.8637		2034	1.58815	1.3607	1.84594		2034	1.64217	1.41762	1.90068
																							2035	1.58522	1.30622	1.89797		2035	1.61891	1.38082	1.88485		2035	1.67897	1.44519	1.95219
																							2036	1.60675	1.31754	1.93179		2036	1.64952	1.4002	1.92357		2036	1.71589	1.47308	1.99936
																							2037	1.6248	1.32674	1.96029		2037	1.67728	1.41705	1.96514		2037	1.75022	1.49945	2.04061
																							2038	1.64123	1.33538	1.98752		2038	1.70401	1.43382	2.00646		2038	1.78381	1.52389	2.08313
																							2039	1.65473	1.34226	2.0085		2039	1.72838	1.44859	2.04005		2039	1.81532	1.54587	2.12448
																							2040	1.66541	1.34771	2.02884		2040	1.75078	1.46225	2.07103		2040	1.84502	1.56709	2.17032
																							2041	1.6742	1.35201	2.04471		2041	1.77238	1.4768	2.10138		2041	1.87403	1.58997	2.20533
																							2042	1.68299	1.35245	2.06027		2042	1.79489	1.49233	2.13139		2042	1.90404	1.61311	2.24048
																							2043	1.69268	1.35598	2.07776		2043	1.8189	1.50908	2.16404		2043	1.93578	1.63644	2.2869
																							2044	1.70372	1.36229	2.09726		2044	1.84475	1.52755	2.19847		2044	1.96964	1.66372	2.33027
																							2045	1.71785	1.3722	2.11937		2045	1.8741	1.5482	2.23819		2045	2.00729	1.69434	2.3725
																							2046	1.73313	1.37996	2.1419		2046	1.90493	1.56864	2.28172		2046	2.04673	1.72451	2.4199
																							2047	1.74889	1.38687	2.16497		2047	1.93653	1.58732	2.32624		2047	2.08724	1.75106	2.46546
																							2048	1.76261	1.39244	2.18818		2048	1.96633	1.60658	2.36557		2048	2.12627	1.77719	2.5213
																							2049	1.77205	1.39582	2.20573		2049	1.99201	1.62291	2.4052		2049	2.16149	1.80215	2.56715
																							2050	1.77691	1.39688	2.21649		2050	2.01327	1.6364	2.4409		2050	2.19302	1.82351	2.60624
																							2051	1.78004	1.39759	2.22388		2051	2.0331	1.64959	2.47523		2051	2.22417	1.84504	2.64394
																							2052	1.78273	1.39815	2.23219		2052	2.05256	1.66206	2.5079		2052	2.25563	1.86821	2.68511
																							2053	1.78538	1.39877	2.23834		2053	2.072	1.67404	2.53774		2053	2.2876	1.89206	2.72146
																							2054	1.7894	1.40007	2.2489		2054	2.09282	1.68811	2.57153		2054	2.32149	1.91517	2.76332
																							2055	1.796	1.40259	2.26145		2055	2.11631	1.70368	2.60821		2055	2.35855	1.94223	2.81699
																							2056	1.80483	1.40596	2.27588		2056	2.1421	1.72035	2.64745		2056	2.39841	1.97243	2.87509
																							2057	1.81254	1.40833	2.28954		2057	2.1668	1.73604	2.68543		2057	2.43766	2.00133	2.92654
																							2058	1.81918	1.41028	2.30204		2058	2.19047	1.75139	2.71798		2058	2.47631	2.02972	2.97818
																							2059	1.82524	1.41241	2.31382		2059	2.2136	1.76648	2.74948		2059	2.51485	2.05794	3.02685
																							2060	1.82826	1.41262	2.32291		2060	2.23376	1.77967	2.77772		2060	2.55101	2.08338	3.07825
																							2061	1.82884	1.4112	2.32909		2061	2.25161	1.79149	2.8029		2061	2.58552	2.10739	3.12855
																							2062	1.8283	1.40977	2.33369		2062	2.26847	1.8016	2.82719		2062	2.61964	2.13125	3.17808
																							2063	1.82795	1.40857	2.33775		2063	2.28563	1.81287	2.85869		2063	2.65459	2.15622	3.22939
																							2064	1.82811	1.40754	2.34143		2064	2.30339	1.82492	2.89065		2064	2.69062	2.18231	3.28033
																							2065	1.82925	1.40674	2.34634		2065	2.32224	1.83776	2.92351		2065	2.72818	2.20999	3.3332
																							2066	1.83316	1.4079	2.35338		2066	2.34398	1.85211	2.95892		2066	2.76909	2.24121	3.38968
																							2067	1.83884	1.41015	2.36402		2067	2.36762	1.86739	2.9959		2067	2.81234	2.27437	3.44311
																							2068	1.84424	1.41209	2.37096		2068	2.39107	1.88205	3.02957		2068	2.85579	2.30721	3.49719
																							2069	1.84724	1.41231	2.37739		2069	2.41216	1.89492	3.0598		2069	2.89726	2.33756	3.55468
																							2070	1.8474	1.41049	2.38117		2070	2.4303	1.90561	3.08831		2070	2.93619	2.36525	3.61215
																							2071	1.84507	1.40694	2.38242		2071	2.44568	1.91456	3.11436		2071	2.97288	2.39095	3.66762
																							2072	1.84209	1.40301	2.38094		2072	2.46039	1.92325	3.13908		2072	3.0093	2.41687	3.72269
																							2073	1.83909	1.39914	2.38091		2073	2.47513	1.9316	3.16365		2073	3.04623	2.44345	3.77803
																							2074	1.83553	1.39547	2.38026		2074	2.48932	1.93987	3.18101		2074	3.08311	2.47029	3.83134
																							2075	1.832	1.39178	2.37936		2075	2.50353	1.94831	3.20442		2075	3.12056	2.49978	3.88073
																							2076	1.82848	1.38797	2.38101		2076	2.51776	1.95663	3.22756		2076	3.15857	2.5273	3.94675
																							2077	1.82584	1.38457	2.38073		2077	2.53286	1.96541	3.24781		2077	3.19804	2.55571	4.0042
																							2078	1.82494	1.38194	2.38176		2078	2.54976	1.97492	3.27006		2078	3.23989	2.58578	4.06402
																							2079	1.82532	1.37975	2.38395		2079	2.56798	1.98485	3.2893		2079	3.28365	2.61862	4.12687
																							2080	1.8257	1.37737	2.38613		2080	2.58635	1.99476	3.3104		2080	3.32807	2.65205	4.1909
																							2081	1.82455	1.37411	2.38682		2081	2.60349	2.00436	3.33507		2081	3.3716	2.68431	4.24938
																							2082	1.82201	1.37021	2.38596		2082	2.61922	2.01312	3.35807		2082	3.41419	2.71575	4.30403
																							2083	1.81736	1.36523	2.38267		2083	2.63267	2.02037	3.38004		2083	3.45501	2.74526	4.35661
																							2084	1.81186	1.36	2.37762		2084	2.64506	2.02697	3.40352		2084	3.49528	2.77451	4.40828
																							2085	1.80461	1.35376	2.37061		2085	2.65546	2.0324	3.42284		2085	3.53406	2.80328	4.45827
																							2086	1.79675	1.34736	2.3625		2086	2.66499	2.03778	3.43605		2086	3.57248	2.83052	4.5163
																							2087	1.78978	1.34147	2.35491		2087	2.67521	2.04351	3.45203		2087	3.61215	2.85854	4.5756
																							2088	1.78374	1.33593	2.34852		2088	2.68615	2.04834	3.47326		2088	3.65312	2.8941	4.64188
																							2089	1.7796	1.33141	2.34455		2089	2.69882	2.05511	3.49521		2089	3.69639	2.925	4.71243
																							2090	1.77812	1.32843	2.34286		2090	2.71359	2.06391	3.51787		2090	3.74269	2.95768	4.77827
																							2091	1.77789	1.32785	2.34232		2091	2.72871	2.07234	3.53997		2091	3.79051	2.99444	4.84501
																							2092	1.77881	1.32694	2.34294		2092	2.74437	2.08144	3.56192		2092	3.8397	3.03642	4.91389
																							2093	1.77715	1.32243	2.34222		2093	2.75687	2.08833	3.58144		2093	3.88632	3.0701	4.97909
																							2094	1.77202	1.31544	2.34263		2094	2.7653	2.09248	3.59798		2094	3.92933	3.10103	5.03867
																							2095	1.76524	1.30764	2.3346		2095	2.77156	2.09457	3.61283		2095	3.9706	3.12761	5.09535
																							2096	1.75741	1.29935	2.3244		2096	2.77628	2.09657	3.62637		2096	4.01081	3.15469	5.1502
																							2097	1.75015	1.29291	2.31794		2097	2.78116	2.09916	3.63542		2097	4.05165	3.18094	5.20563
																							2098	1.74358	1.28677	2.31206		2098	2.78636	2.10155	3.64295		2098	4.09332	3.20818	5.26214
																							2099	1.73889	1.28169	2.30776		2099	2.7931	2.10502	3.65237		2099	4.13709	3.23822	5.32153
																							2100	1.73643	1.27774	2.30522		2100	2.80215	2.11017	3.66567		2100	4.18385	3.27228	5.38648
																							2101	1.7354	1.27457	2.30358		2101	2.81297	2.1167	3.68217		2101	4.23324	3.30973	5.45499
																							2102	1.73279	1.27051	2.30045		2102	2.82223	2.12184	3.69731		2102	4.28134	3.3434	5.52284
																							2103	1.72873	1.26603	2.29589		2103	2.82991	2.12599	3.71117		2103	4.32773	3.37517	5.58927
																							2104	1.72307	1.26093	2.28988		2104	2.83581	2.12927	3.7237		2104	4.37207	3.4045	5.65396
																							2105	1.71533	1.25478	2.28197		2105	2.83941	2.13113	3.7344		2105	4.4137	3.43651	5.71628
																							2106	1.70703	1.24908	2.27341		2106	2.84228	2.13235	3.74443		2106	4.45418	3.46143	5.77303
																							2107	1.69889	1.24354	2.26488		2107	2.84517	2.13366	3.75431		2107	4.49426	3.48635	5.82875
																							2108	1.69169	1.23724	2.25706		2108	2.84888	2.13559	3.76459		2108	4.53481	3.51243	5.88461
																							2109	1.68594	1.23253	2.25036		2109	2.85398	2.13849	3.7749		2109	4.5764	3.54035	5.94111
																							2110	1.68258	1.22948	2.24571		2110	2.86143	2.14322	3.78495		2110	4.62006	3.57154	5.99909
																							2111	1.68315	1.23024	2.24456		2111	2.87283	2.15147	3.79825		2111	4.6675	3.60846	6.05999
																							2112	1.68267	1.22806	2.24727		2112	2.8831	2.15658	3.81103		2112	4.71345	3.64226	6.11955
																							2113	1.6806	1.22531	2.24782		2113	2.89156	2.16123	3.8221		2113	4.75714	3.67262	6.17688
																							2114	1.67528	1.22086	2.24399		2114	2.89654	2.1637	3.8303		2114	4.79678	3.69707	6.23204
																							2115	1.66912	1.21648	2.23876		2115	2.90047	2.16593	3.83729		2115	4.83484	3.72017	6.28496
																							2116	1.6617	1.21105	2.23179		2116	2.903	2.16755	3.84307		2116	4.87103	3.74105	6.33516
																							2117	1.65407	1.20412	2.22171		2117	2.90518	2.16913	3.84839		2117	4.90642	3.76148	6.38415
																							2118	1.64695	1.19714	2.21163		2118	2.9078	2.17093	3.85398		2118	4.94188	3.78256	6.43324
																							2119	1.64085	1.19212	2.2031		2119	2.91141	2.17321	3.86005		2119	4.978	3.80506	6.4833
																							2120	1.63737	1.18917	2.19946		2120	2.91766	2.17686	3.86682		2120	5.0165	3.8315	6.53696
																							2121	1.63694	1.19026	2.19935		2121	2.92702	2.18196	3.87579		2121	5.05798	3.85768	6.59517
																							2122	1.63875	1.19105	2.20211		2122	2.93866	2.18803	3.89062		2122	5.10157	3.8886	6.65675
																							2123	1.63707	1.18726	2.20178		2123	2.94661	2.19174	3.90415		2123	5.14103	3.91472	6.7126
																							2124	1.63435	1.18465	2.19989		2124	2.95332	2.1954	3.91362		2124	5.17877	3.93954	6.76583
																							2125	1.62894	1.17987	2.19495		2125	2.95714	2.19732	3.92072		2125	5.21312	3.95993	6.81423
																							2126	1.6214	1.17427	2.18725		2126	2.95864	2.19733	3.92563		2126	5.24461	3.97929	6.85834
																							2127	1.61392	1.16834	2.17908		2127	2.96008	2.19745	3.93025		2127	5.27563	4.0003	6.90193
																							2128	1.6069	1.1613	2.17124		2128	2.96194	2.19794	3.93517		2128	5.30674	4.01781	6.94854
																							2129	1.60126	1.15691	2.16491		2129	2.96518	2.19946	3.94119		2129	5.33896	4.03737	6.99769
																							2130	1.59836	1.15421	2.16169		2130	2.97121	2.20299	3.94954		2130	5.37383	4.06121	7.05166
																							2131	1.60045	1.15842	2.16416		2131	2.98241	2.21026	3.96225		2131	5.4139	4.09298	7.11503
																							2132	1.60214	1.15924	2.1671		2132	2.9932	2.21693	3.97517		2132	5.45339	4.12121	7.17489
																							2133	1.60262	1.15882	2.16889		2133	3.00265	2.22218	3.98696		2133	5.4912	4.14625	7.23064
																							2134	1.60019	1.15634	2.16751		2134	3.00898	2.22516	3.9962		2134	5.52544	4.16856	7.27624
																							2135	1.59464	1.15168	2.16278		2135	3.01195	2.22652	4.00245		2135	5.55579	4.1878	7.31928
																							2136	1.58671	1.14469	2.15457		2136	3.01234	2.22587	4.00631		2136	5.58302	4.20029	7.36191
																							2137	1.57925	1.13519	2.14594		2137	3.01313	2.22571	4.0102		2137	5.61029	4.21403	7.40463
																							2138	1.57257	1.13031	2.13836		2138	3.01469	2.22619	4.01633		2138	5.63809	4.22911	7.44774
																							2139	1.56663	1.12545	2.13176		2139	3.017	2.22715	4.02309		2139	5.6664	4.24521	7.49136
																							2140	1.56194	1.12186	2.12662		2140	3.02057	2.22895	4.03068		2140	5.6958	4.26314	7.52803
																							2141	1.55977	1.11965	2.12469		2141	3.02674	2.23254	4.03998		2141	5.72772	4.28506	7.56665
																							2142	1.55961	1.11931	2.12611		2142	3.03497	2.23747	4.05064		2142	5.76164	4.30978	7.60718
																							2143	1.55889	1.11784	2.12751		2143	3.04257	2.24181	4.06093		2143	5.79473	4.3327	7.64758
																							2144	1.55767	1.11616	2.12828		2144	3.04951	2.24566	4.07075		2144	5.82686	4.35422	7.68728
																							2145	1.55558	1.11397	2.12794		2145	3.05542	2.24882	4.07989		2145	5.85764	4.37392	7.73021
																							2146	1.55143	1.1105	2.12494		2146	3.05907	2.25041	4.08751		2146	5.88573	4.39201	7.77036
																							2147	1.54735	1.1073	2.12127		2147	3.06261	2.25205	4.09496		2147	5.91338	4.40668	7.80979
																							2148	1.5428	1.10262	2.11696		2148	3.06558	2.25332	4.10206		2148	5.94017	4.42215	7.84802
																							2149	1.53819	1.09833	2.11234		2149	3.06837	2.25449	4.10898		2149	5.96648	4.43829	7.88554
																							2150	1.53408	1.09514	2.10824		2150	3.07156	2.25597	4.11614		2150	5.99298	4.45497	7.9233
																							2151	1.53068	1.09232	2.10505		2151	3.07539	2.25789	4.12372		2151	6.01992	4.47259	7.96169
																							2152	1.52946	1.09074	2.10334		2152	3.0814	2.26132	4.13272		2152	6.04897	4.49167	8.00306
																							2153	1.53157	1.09243	2.1044		2153	3.09083	2.26708	4.14402		2153	6.0815	4.51523	8.04948
																							2154	1.53526	1.09279	2.10724		2154	3.10184	2.2738	4.15647		2154	6.11567	4.5435	8.0984
																							2155	1.53706	1.09436	2.10879		2155	3.11079	2.27816	4.1676		2155	6.14755	4.56741	8.14421
																							2156	1.53685	1.0943	2.10847		2156	3.11747	2.2813	4.17713		2156	6.17681	4.58835	8.1863
																							2157	1.53446	1.09166	2.10624		2157	3.12171	2.28328	4.18501		2157	6.20324	4.60362	8.22443
																							2158	1.52987	1.08656	2.10181		2158	3.1235	2.28411	4.19116		2158	6.22679	4.61684	8.26008
																							2159	1.52423	1.08044	2.09587		2159	3.12404	2.28428	4.19639		2159	6.24873	4.62924	8.29613
																							2160	1.51892	1.0761	2.09034		2160	3.1248	2.28412	4.20168		2160	6.27065	4.642	8.33166
																							2161	1.51507	1.07332	2.08609		2161	3.12699	2.28498	4.20787		2161	6.29391	4.65605	8.36845
																							2162	1.51387	1.07195	2.08453		2162	3.13188	2.2877	4.21583		2162	6.31991	4.67236	8.40835
																							2163	1.51633	1.07375	2.08759		2163	3.14053	2.29296	4.22629		2163	6.34985	4.6918	8.45304
																							2164	1.52126	1.07872	2.09388		2164	3.15173	2.29877	4.23854		2164	6.38253	4.71676	8.5015
																							2165	1.52327	1.07897	2.09758		2165	3.1598	2.30215	4.2496		2165	6.41184	4.74189	8.5542
																							2166	1.52409	1.07865	2.09971		2166	3.16643	2.30525	4.26032		2166	6.4394	4.76397	8.60285
																							2167	1.5212	1.07529	2.09769		2167	3.16905	2.30607	4.267		2167	6.46248	4.77889	8.63669
																							2168	1.51605	1.07062	2.09266		2168	3.1691	2.30597	4.27073		2168	6.4825	4.78894	8.67364
																							2169	1.51059	1.06599	2.08687		2169	3.16868	2.30578	4.27375		2169	6.50177	4.79797	8.71568
																							2170	1.50574	1.06181	2.08157		2170	3.16879	2.30586	4.27771		2170	6.52139	4.80793	8.75765
																							2171	1.50201	1.05788	2.07728		2171	3.16998	2.30618	4.28288		2171	6.542	4.81993	8.80008
																							2172	1.50026	1.05624	2.07537		2172	3.17315	2.30769	4.28932		2172	6.56462	4.83548	8.84371
																							2173	1.50192	1.05806	2.07708		2173	3.17984	2.3113	4.29809		2173	6.59094	4.85716	8.8898
																							2174	1.50486	1.06009	2.08207		2174	3.18784	2.31491	4.30978		2174	6.61867	4.87932	8.93635
																							2175	1.50804	1.06223	2.08672		2175	3.19598	2.31855	4.32173		2175	6.64651	4.89815	8.98299
																							2176	1.51	1.06278	2.09018		2176	3.20274	2.32141	4.33238		2176	6.67279	4.9144	9.02849
																							2177	1.50936	1.06083	2.09073		2177	3.20663	2.32279	4.34009		2177	6.69585	4.9261	9.07155
																							2178	1.50623	1.05703	2.08757		2178	3.20773	2.32288	4.34693		2178	6.71569	4.93377	9.11202
																							2179	1.50242	1.05339	2.08175		2179	3.20796	2.32279	4.35301		2179	6.73431	4.94061	9.15128
																							2180	1.4983	1.04963	2.07633		2180	3.20775	2.32139	4.35816		2180	6.75226	4.94677	9.18976
																							2181	1.49446	1.0463	2.07398		2181	3.20771	2.31996	4.36299		2181	6.77022	4.95339	9.22797
																							2182	1.491	1.04268	2.07177		2182	3.20798	2.3188	4.36653		2182	6.78834	4.9604	9.26607
																							2183	1.4882	1.04007	2.06995		2183	3.20883	2.31813	4.36997		2183	6.80696	4.96833	9.3043
																							2184	1.48655	1.03858	2.0689		2184	3.21082	2.31834	4.37429		2184	6.82667	4.97796	9.34314
																							2185	1.48673	1.0386	2.06913		2185	3.21464	2.31996	4.38012		2185	6.84826	4.99037	9.38323
																							2186	1.49003	1.04064	2.07162		2186	3.22168	2.32404	4.38867		2186	6.87328	5.00771	9.42372
																							2187	1.49303	1.04297	2.07381		2187	3.22838	2.32746	4.39708		2187	6.89797	5.0234	9.46169
																							2188	1.4956	1.04475	2.07596		2188	3.23446	2.3305	4.40498		2188	6.92191	5.03848	9.49894
																							2189	1.49797	1.04595	2.07811		2189	3.24022	2.33322	4.41342		2189	6.94535	5.05436	9.54438
																							2190	1.49742	1.04365	2.07822		2190	3.24278	2.33319	4.41963		2190	6.96524	5.06514	9.58715
																							2191	1.49475	1.04031	2.07702		2191	3.24293	2.33141	4.42313		2191	6.98227	5.07285	9.61498
																							2192	1.49167	1.03713	2.07554		2192	3.24251	2.32951	4.42584		2192	6.99842	5.08024	9.64067
																							2193	1.48927	1.03442	2.07445		2193	3.24272	2.3283	4.42907		2193	7.01507	5.08883	9.66621
																							2194	1.48761	1.03265	2.07374		2194	3.24367	2.32769	4.43301		2194	7.03238	5.09849	9.69048
																							2195	1.48734	1.03198	2.07398		2195	3.24604	2.3282	4.43936		2195	7.0511	5.11023	9.71668
																							2196	1.49012	1.03376	2.07638		2196	3.2516	2.3312	4.4476		2196	7.07318	5.12652	9.74747
																							2197	1.49532	1.03955	2.08046		2197	3.25973	2.33602	4.45861		2197	7.09805	5.14612	9.78263
																							2198	1.50069	1.04378	2.09023		2198	3.26802	2.34081	4.4706		2198	7.12313	5.16526	9.8238
																							2199	1.50351	1.04591	2.0963		2199	3.27357	2.34314	4.47993		2199	7.14521	5.17978	9.86786
																							2200	1.50367	1.04497	2.09808		2200	3.27623	2.34315	4.48617		2200	7.16398	5.18918	9.90803
																							2201	1.50122	1.04114	2.09569		2201	3.27602	2.341	4.48925		2201	7.17942	5.19666	9.94107
																							2202	1.4984	1.03741	2.09245		2202	3.27532	2.33882	4.49143		2202	7.19405	5.2032	9.96536
																							2203	1.4959	1.0343	2.08973		2203	3.27492	2.33701	4.49515		2203	7.20882	5.21035	9.99002
																							2204	1.493	1.03063	2.08649		2204	3.27405	2.33487	4.49929		2204	7.22295	5.21672	10.0136
																							2205	1.49046	1.0275	2.08376		2205	3.27353	2.33317	4.50357		2205	7.2373	5.22373	10.0375
																							2206	1.48823	1.02521	2.08191		2206	3.2733	2.33169	4.50799		2206	7.25186	5.2311	10.0617
																							2207	1.48724	1.02425	2.08169		2207	3.27432	2.33124	4.51063		2207	7.26767	5.24037	10.0878
																							2208	1.48842	1.02507	2.0843		2208	3.27762	2.33252	4.51616		2208	7.28585	5.25154	10.1183
																							2209	1.49133	1.02782	2.09016		2209	3.28274	2.33506	4.52462		2209	7.30602	5.26215	10.1523
																							2210	1.49482	1.03015	2.09705		2210	3.28846	2.33797	4.53423		2210	7.32683	5.27287	10.1877
																							2211	1.49714	1.03156	2.10224		2211	3.2929	2.33967	4.54212		2211	7.34622	5.28251	10.2206
																							2212	1.49829	1.03203	2.1055		2212	3.29602	2.34032	4.54803		2212	7.36404	5.29121	10.2506
																							2213	1.49752	1.03009	2.1058		2213	3.29705	2.33929	4.55073		2213	7.37944	5.29846	10.2765
																							2214	1.49596	1.02759	2.10467		2214	3.29715	2.33771	4.55179		2214	7.39362	5.3052	10.3001
																							2215	1.49276	1.02293	2.10111		2215	3.29547	2.33473	4.54982		2215	7.40571	5.31073	10.3202
																							2216	1.48912	1.01994	2.09668		2216	3.29322	2.33158	4.54898		2216	7.41697	5.31597	10.3387
																							2217	1.48658	1.01795	2.09389		2217	3.29209	2.32948	4.54829		2217	7.42926	5.32198	10.359
																							2218	1.48522	1.01671	2.09302		2218	3.29218	2.32833	4.54863		2218	7.44277	5.32869	10.3817
																							2219	1.48602	1.01711	2.09547		2219	3.29452	2.32892	4.55294		2219	7.45865	5.33679	10.4086
																							2220	1.48937	1.01938	2.10197		2220	3.29955	2.33148	4.56217		2220	7.47745	5.34646	10.4406
																							2221	1.49379	1.02248	2.10882		2221	3.30571	2.33479	4.57369		2221	7.4975	5.35655	10.475
																							2222	1.49957	1.02798	2.11648		2222	3.31326	2.3391	4.58557		2222	7.51906	5.36737	10.5119
																							2223	1.50245	1.02988	2.12131		2223	3.31774	2.34056	4.59349		2223	7.53733	5.37576	10.5434
																							2224	1.5017	1.0277	2.12194		2224	3.31827	2.33892	4.59704		2224	7.55109	5.38153	10.5667
																							2225	1.49908	1.02382	2.12003		2225	3.31669	2.33586	4.5965		2225	7.56228	5.3861	10.5856
																							2226	1.49506	1.01836	2.11626		2226	3.31353	2.33174	4.59468		2226	7.57151	5.38973	10.601
																							2227	1.49167	1.01544	2.1129		2227	3.31097	2.32837	4.59439		2227	7.58115	5.39391	10.6172
																							2228	1.48868	1.01294	2.11001		2228	3.30879	2.32538	4.59463		2228	7.59106	5.39827	10.634
																							2229	1.48759	1.01207	2.10921		2229	3.30857	2.32408	4.5971		2229	7.60301	5.404	10.6543
																							2230	1.48948	1.01331	2.11184		2230	3.3115	2.32518	4.60329		2230	7.61832	5.41152	10.6806
																							2231	1.4926	1.01496	2.11623		2231	3.31575	2.32712	4.61133		2231	7.63514	5.41963	10.7097
																							2232	1.49501	1.01578	2.12015		2232	3.31923	2.32822	4.61601		2232	7.65112	5.42696	10.7373
																							2233	1.49733	1.01765	2.1239		2233	3.32253	2.32917	4.61967		2233	7.66681	5.4341	10.7644
																							2234	1.4978	1.01711	2.12569		2234	3.32383	2.32838	4.62211		2234	7.68026	5.43974	10.7877
																							2235	1.4968	1.0151	2.12564		2235	3.32347	2.32638	4.62347		2235	7.69171	5.44432	10.8074
																							2236	1.49383	1.01162	2.12327		2236	3.32095	2.32272	4.62341		2236	7.70063	5.44757	10.8228
																							2237	1.49068	1.00899	2.12107		2237	3.31816	2.31909	4.62304		2237	7.709	5.45085	10.8371
																							2238	1.4881	1.0064	2.12082		2238	3.3159	2.31602	4.62288		2238	7.7178	5.45446	10.8522
																							2239	1.48651	1.00335	2.1212		2239	3.31465	2.31384	4.62323		2239	7.72759	5.45864	10.8692
																							2240	1.48669	1.003	2.1227		2240	3.31525	2.31308	4.62466		2240	7.73931	5.46386	10.8895
																							2241	1.48987	1.00599	2.12611		2241	3.31899	2.31477	4.62805		2241	7.75444	5.4709	10.9159
																							2242	1.49493	1.01	2.13082		2242	3.32474	2.31787	4.63276		2242	7.77183	5.47888	10.9464
																							2243	1.49874	1.01203	2.13486		2243	3.32917	2.31957	4.63675		2243	7.78786	5.48569	10.9747
																							2244	1.50064	1.01232	2.13766		2244	3.33148	2.31952	4.63947		2244	7.80147	5.49192	10.9986
																							2245	1.4998	1.01062	2.13872		2245	3.3308	2.31708	4.64034		2245	7.81167	5.4957	11.0166
																							2246	1.49693	1.00778	2.13841		2246	3.32787	2.31304	4.63971		2246	7.81913	5.49765	11.0298
																							2247	1.49405	1.00396	2.13801		2247	3.32483	2.30918	4.63888		2247	7.82623	5.49959	11.0423
																							2248	1.4909	0.999855	2.13746		2248	3.32147	2.30514	4.63773		2248	7.83282	5.50129	11.054
																							2249	1.48786	0.996767	2.13695		2249	3.31819	2.30133	4.63649		2249	7.83932	5.50314	11.0718
																							2250	1.48505	0.99394	2.13643		2250	3.31502	2.29777	4.63495		2250	7.84546	5.505	11.09
																							2251	1.48275	0.991818	2.13592		2251	3.31211	2.29465	4.63301		2251	7.85112	5.50664	11.107
																							2252	1.48191	0.991335	2.13614		2252	3.31064	2.29283	4.63165		2252	7.85792	5.50947	11.124
																							2253	1.48321	0.992859	2.13765		2253	3.31146	2.29282	4.63158		2253	7.86704	5.51435	11.1421
																							2254	1.4863	0.99569	2.14029		2254	3.31422	2.29423	4.63262		2254	7.87825	5.52077	11.1612
																							2255	1.48865	0.996896	2.14254		2255	3.31628	2.29488	4.63326		2255	7.88869	5.52646	11.1795
																							2256	1.49034	0.997929	2.1443		2256	3.31765	2.29505	4.63368		2256	7.89829	5.53156	11.1971
																							2257	1.49087	0.997696	2.14532		2257	3.31782	2.29424	4.63427		2257	7.90648	5.5357	11.2135
																							2258	1.48945	0.995615	2.14507		2258	3.31593	2.29183	4.63344		2258	7.91229	5.53813	11.2281
																							2259	1.48707	0.993268	2.14414		2259	3.31302	2.28886	4.63187		2259	7.91681	5.53985	11.2416
																							2260	1.4833	0.989421	2.14232		2260	3.30866	2.28487	4.6293		2260	7.9196	5.54048	11.2536
																							2261	1.47943	0.986159	2.14034		2261	3.30418	2.28103	4.62659		2261	7.92211	5.54125	11.2652
																							2262	1.47678	0.984285	2.13831		2262	3.30104	2.27835	4.62476		2262	7.92598	5.54326	11.2774
																							2263	1.47536	0.983322	2.13689		2263	3.29926	2.27673	4.62387		2263	7.93132	5.54645	11.2904
																							2264	1.47628	0.984804	2.13902		2264	3.30003	2.2771	4.6247		2264	7.93947	5.55174	11.3051
																							2265	1.47982	0.988425	2.14245		2265	3.30365	2.27955	4.62754		2265	7.95085	5.55944	11.3219
																							2266	1.48442	0.992272	2.14596		2266	3.30849	2.28268	4.6313		2266	7.96372	5.56801	11.3398
																							2267	1.48938	0.995967	2.14973		2267	3.31376	2.28609	4.6354		2267	7.97717	5.57695	11.3581
																							2268	1.49044	0.995296	2.15116		2268	3.31495	2.28595	4.63686		2268	7.98625	5.58213	11.3735
																							2269	1.48871	0.993377	2.15066		2269	3.3131	2.2836	4.63614		2269	7.99179	5.58472	11.3865
																							2270	1.4851	0.989358	2.14891		2270	3.30922	2.27987	4.63402		2270	7.99494	5.58571	11.3976
																							2271	1.48107	0.985922	2.14682		2271	3.30487	2.27612	4.63151		2271	7.99737	5.58653	11.4081
																							2272	1.47704	0.982449	2.14471		2272	3.30052	2.27249	4.629		2272	7.9997	5.58752	11.4184
																							2273	1.47416	0.980444	2.14322		2273	3.2974	2.27003	4.62728		2273	8.0033	5.58975	11.4292
																							2274	1.47378	0.98092	2.14317		2274	3.29698	2.26984	4.62738		2274	8.00983	5.59437	11.4419
																							2275	1.47589	0.983318	2.14525		2275	3.29925	2.27126	4.62936		2275	8.01943	5.60128	11.4566
																							2276	1.47896	0.985874	2.14775		2276	3.30264	2.27337	4.63216		2276	8.03039	5.60898	11.4723
																							2277	1.48081	0.986581	2.14954		2277	3.30478	2.27438	4.63418		2277	8.0401	5.61541	11.4872
																							2278	1.48131	0.986418	2.15043		2278	3.30547	2.27425	4.63518		2278	8.04819	5.62048	11.5009
																							2279	1.4802	0.984975	2.15028		2279	3.30441	2.2728	4.63501		2279	8.0543	5.62403	11.5133
																							2280	1.47696	0.981443	2.14875		2280	3.30109	2.26978	4.63327		2280	8.05781	5.62566	11.5239
																							2281	1.47328	0.978317	2.14685		2281	3.29724	2.26711	4.63111		2281	8.06056	5.62699	11.5338
																							2282	1.4703	0.976028	2.14397		2282	3.29413	2.26502	4.62942		2282	8.06401	5.6291	11.544
																							2283	1.46802	0.974244	2.14106		2283	3.29178	2.26335	4.62825		2283	8.06828	5.63195	11.5547
																							2284	1.46744	0.974322	2.14072		2284	3.29127	2.26301	4.62831		2284	8.07454	5.63645	11.5665
																							2285	1.46978	0.977199	2.14484		2285	3.29389	2.2648	4.62882		2285	8.08431	5.64368	11.5807
																							2286	1.47436	0.980568	2.14964		2286	3.29897	2.26793	4.63328		2286	8.09694	5.65291	11.5969
																							2287	1.4784	0.982881	2.15282		2287	3.30353	2.27026	4.63759		2287	8.10918	5.66212	11.613
																							2288	1.48068	0.984437	2.15581		2288	3.30623	2.27153	4.64034		2288	8.11941	5.67113	11.6277
																							2289	1.4787	0.981411	2.15541		2289	3.30439	2.26919	4.63991		2289	8.12464	5.67245	11.6392
																							2290	1.47594	0.979308	2.15315		2290	3.3016	2.26731	4.63862		2290	8.12855	5.6728	11.6495
																							2291	1.4725	0.976588	2.15121		2291	3.29808	2.26475	4.63683		2291	8.13152	5.67421	11.6592
																							2292	1.4685	0.973088	2.14815		2292	3.29394	2.26188	4.63456		2292	8.13372	5.6753	11.6682
																							2293	1.46483	0.970139	2.14304		2293	3.29016	2.25881	4.63248		2293	8.13619	5.67685	11.6772
																							2294	1.46291	0.969147	2.14052		2294	3.28823	2.25619	4.63161		2294	8.14067	5.68018	11.6874
																							2295	1.46415	0.971003	2.14285		2295	3.28971	2.25803	4.63305		2295	8.14893	5.6865	11.7001
																							2296	1.4674	0.973292	2.14849		2296	3.2934	2.26157	4.63607		2296	8.15978	5.69458	11.7145
																							2297	1.47188	0.976311	2.15327		2297	3.29844	2.26458	4.64004		2297	8.17228	5.70694	11.7302
																							2298	1.47491	0.977783	2.1569		2298	3.30199	2.26621	4.64308		2298	8.18329	5.71746	11.7449
																							2299	1.4747	0.9768	2.15848		2299	3.30208	2.26546	4.64376		2299	8.19047	5.72199	11.7572
																							2300	1.4739	0.976012	2.15865		2300	3.30145	2.26491	4.64384		2300	8.19668	5.72573	11.7687
